# Supplementary material for: p113 isoform encoded by CUX1 circular RNA drives tumor progression via facilitating ZRF1/BRD4 transactivation
Source: Springer Nature journal article supplement (doi:10.1186/s12943-021-01421-8), 2021-09-27
Supplement: MOESM1 [file 19702138]

## Supplementary Information

p113 isoform encoded by *CUX1* circular RNA drives tumor progression via facilitating ZRF1/BRD4 transactivation

Yang et al.

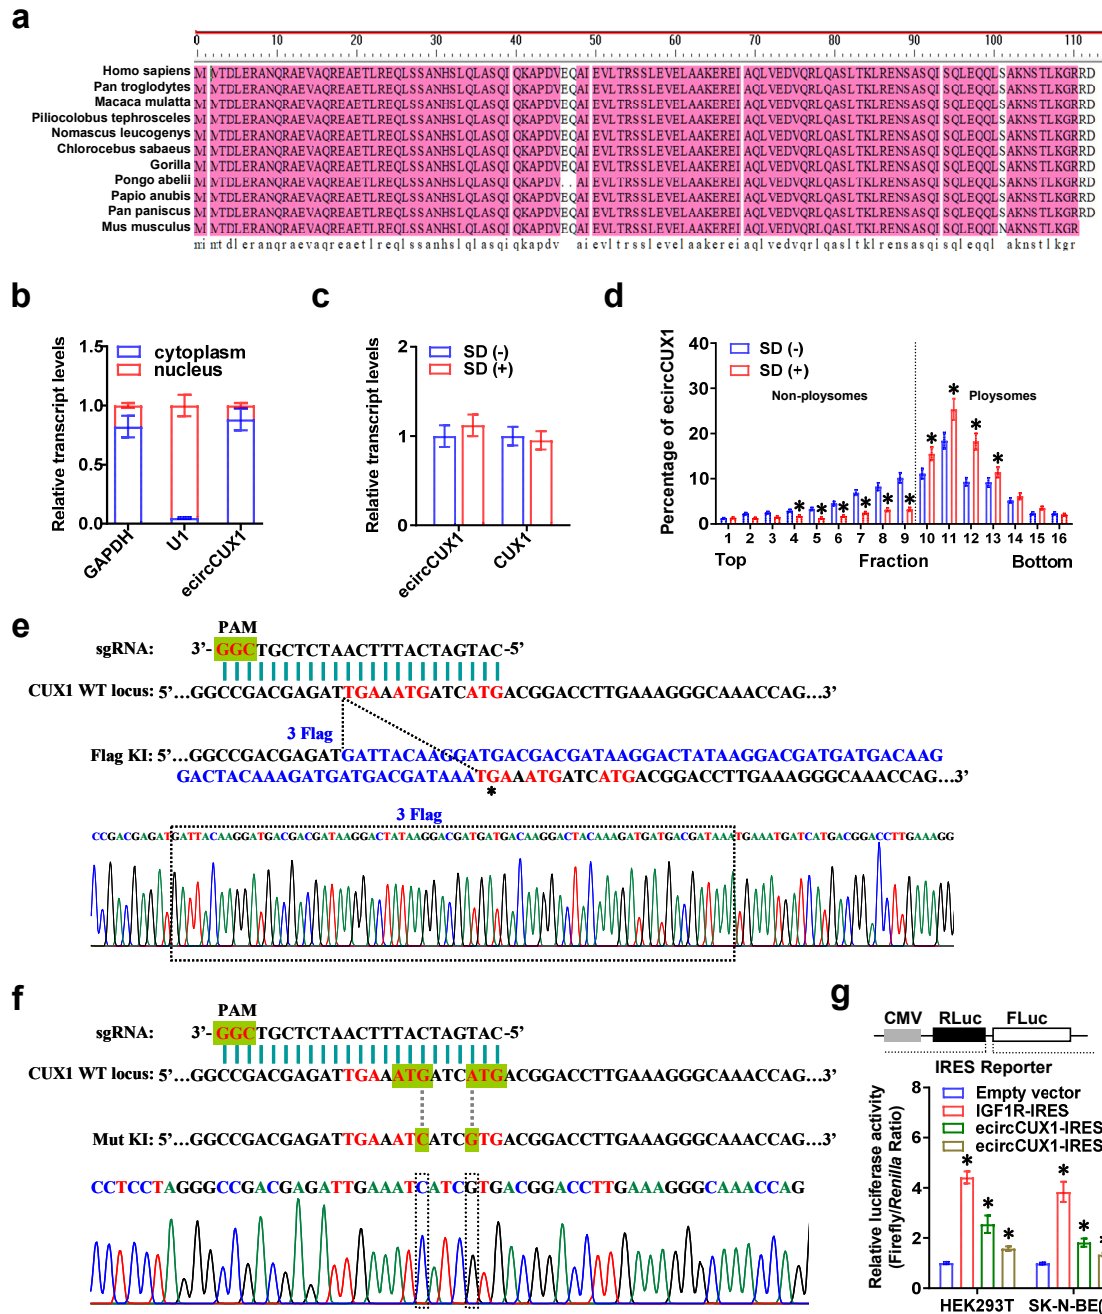

**Supplementary Figure S1. Coding ability of *ecircCUX1* in NB.** **a** Homologous analysis of protein encoded by open reading frame within *ecircCUX1*. **b** Real-time quantitative RT-PCR assay indicating the levels (normalized to  $\beta$ -actin) of *ecircCUX1*, *GAPDH*, and *UI* in the cytoplasmic and nuclear fractions of BE(2)-C cells ( $n=4$ ). **c** Real-time qRT-PCR assay revealing the relative levels of *ecircCUX1* or *CUX1* (normalized to  $\beta$ -actin) in SH-SY5Y cells treated with serum deprivation (SD) for 24 hrs ( $n=5$ ). **d** Sucrose gradient sedimentation assay showing the relative fraction of *ecircCUX1* binding to polysomes in SH-SY5Y cells treated with SD for 24 hrs ( $n=5$ ). **e** and **f** sgRNA-targeting genomic region and Sanger sequencing validation for CRISPR-Cas9-mediated knockin of 3Flag-tagged (**e**) or mutant (**f**) *ecircCUX1*. **g** Dual-luciferase assay indicating the IRES reporter activity of *ecircCUX1* in HEK293T and SK-N-BE(2) cells, while that of *IGF1R* served as a positive control ( $n=4$ ). Student's  $t$  test and ANOVA compared the difference in **c**, **d** and **g**. \* $P<0.05$  vs. SD (-) or empty vector. Data are shown as mean  $\pm$  s.e.m. (error bars) and representative of three independent experiments in **b-g**.

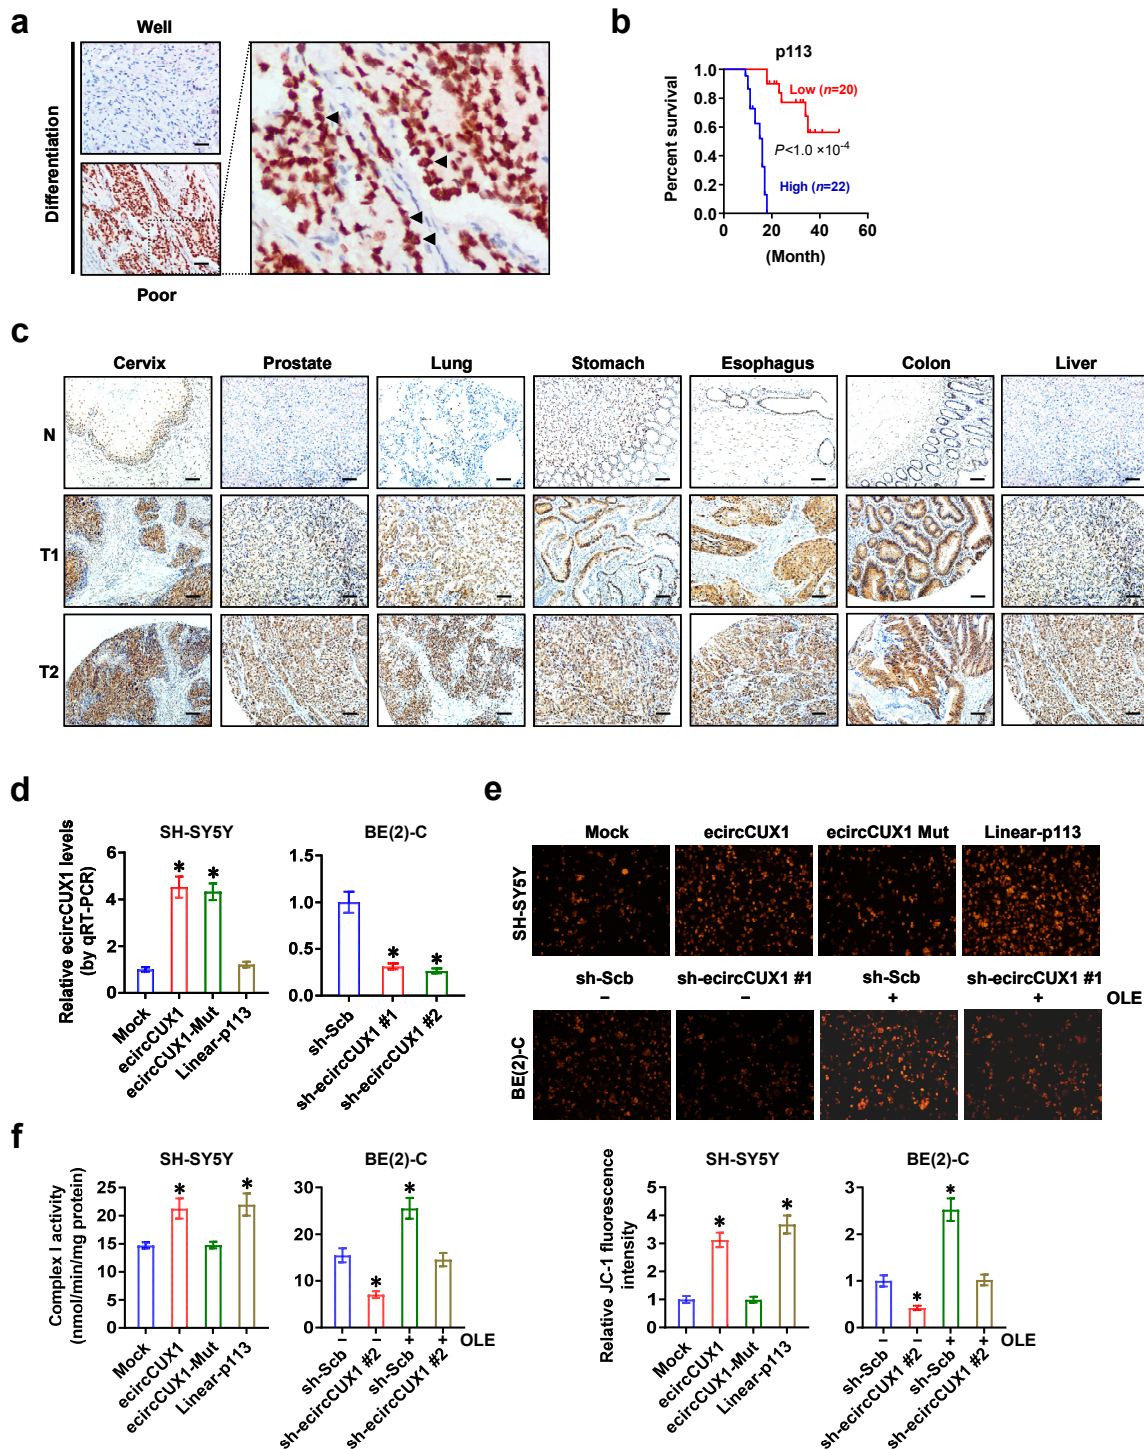

**Supplementary Figure S2. Expression profiles and roles of *ecircCUX1*-encoded p113.** **a** Immunohistochemical staining showing p113 expression in NB tissues (arrowheads). Scale bars: 100  $\mu\text{m}$ . **b** Kaplan–Meier curves indicating overall survival of 42 well-defined NB cases with high or low expression of p113 (cutoff value=3.888). **c** Immunohistochemical staining showing p113 expression in tumoral (T) and normal (N) counterparts of common cancers (arrowheads). Scale bars: 100  $\mu\text{m}$ . **d** Real-time qRT-PCR assay revealing the relative levels of *ecircCUX1* (normalized to  $\beta$ -actin) in SH-SY5Y cells stably transfected with empty vector (mock), *ecircCUX1*, *ecircCUX1* with ORF mutation (*ecircCUX1* Mut), or *p113* ( $n=5$ ). **e** Representative images (left panel) and quantification (right panel) of JC-1 stained SH-SY5Y and BE(2)-C cells stably transfected with mock, *ecircCUX1*, *ecircCUX1* Mut, *p113*, scramble shRNA (sh-Scb), or sh-ecircCUX1, and those treated with BSA or oleic acid (OLE, 200  $\mu\text{mol}\cdot\text{L}^{-1}$ ,  $n=4$ ). **f** Relative complex I activity in SH-SY5Y and BE(2)-C cells stably transfected with mock, *ecircCUX1*, *ecircCUX1* Mut, *p113*, sh-Scb, or sh-ecircCUX1 ( $n=5$ ). ANOVA compared the difference in **d-f**. Log-rank test for survival comparison in **b**. \* $P < 0.05$  vs. mock or sh-Scb. Data are shown as mean  $\pm$  s.e.m. (error bars) and representative of three independent experiments in **d-f**.

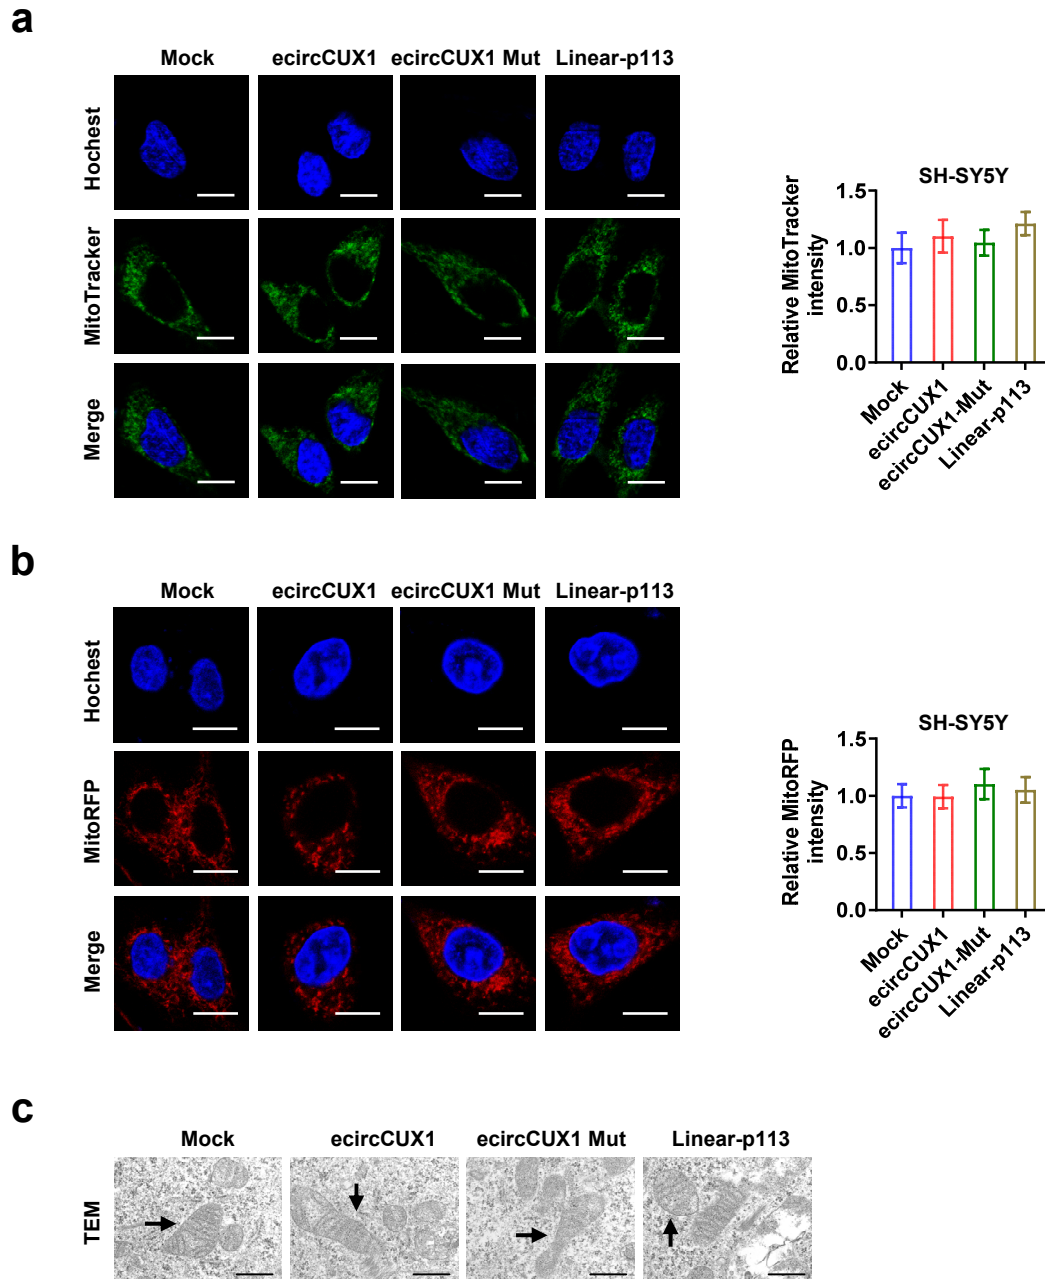

**Supplementary Figure S3. Effects of *ecircCUX1* or *p113* on mitochondrial mass and structure in NB cells.** **a** Representative images and quantification of MitoTracker Green staining ( $100 \text{ nmol} \cdot \text{L}^{-1}$ , at  $37^\circ\text{C}$  for 30 min) revealing mitochondrial mass in SH-SY5Y cells stably transfected with empty vector (mock), *ecircCUX1*, *ecircCUX1* with ORF mutation (*ecircCUX1* Mut), or *p113*, with nuclei stained by Hoechst 33342. Scale bar,  $10 \mu\text{m}$ . **b** Representative images and quantification of MitoRFP reporter-indicated mitochondrial mass in SH-SY5Y cells stably transfected with mock, *ecircCUX1*, *ecircCUX1* Mut, or *p113*, with nuclei stained by Hoechst 33342. Scale bar,  $10 \mu\text{m}$ . **c** Transmission electron microscopy (TEM) showing mitochondrial structure in SH-SY5Y cells stably transfected with mock, *ecircCUX1*, *ecircCUX1* Mut, or *p113*. ANOVA compared the difference in **a** and **b**. Data are shown as mean  $\pm$  s.e.m. (error bars) and representative of three independent experiments in **a** and **b**.

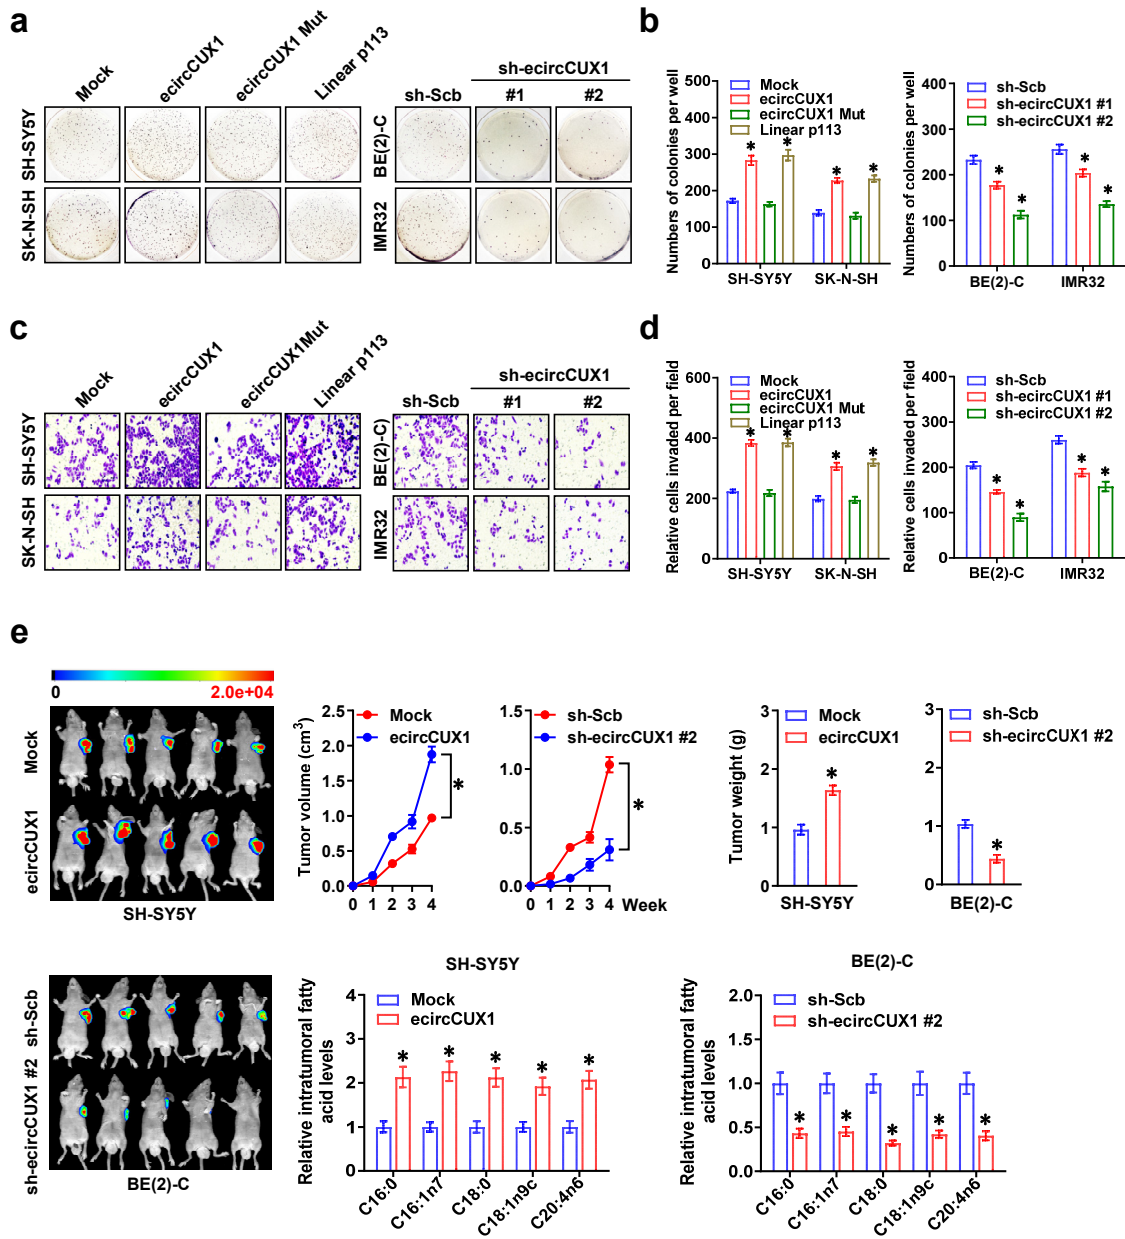

**Supplementary Figure S4. *ecircCUX1* promotes fatty acid oxidation and growth of NB via encoding p113.** **a-d** Representative images and quantification of soft agar (**a** and **b**) and matrigel invasion (**c** and **d**) assays indicating the anchorage-independent growth and invasion of NB cells stably transfected with empty vector (mock), *ecircCUX1*, *ecircCUX1* with ORF mutation (*ecircCUX1* Mut), *p113*, scramble shRNA (sh-Scb), or sh-*ecircCUX1*. **e** *In vivo* imaging (left panel), growth curve (right upper panel), weight at the end points (right upper panel), and fatty acid levels (right lower panel) of xenografts in nude mice formed by subcutaneous injection of SH-SY5Y and BE(2)-C cells stably transfected with mock, *ecircCUX1*, sh-Scb, or sh-*ecircCUX1* #2 ( $n=5$  for each group). ANOVA compared the difference in **b**, **d** and **e**. \* $P<0.05$  vs. mock or sh-Scb. Data are shown as mean  $\pm$  s.e.m. (error bars) and representative of three independent experiments in **a-d**.

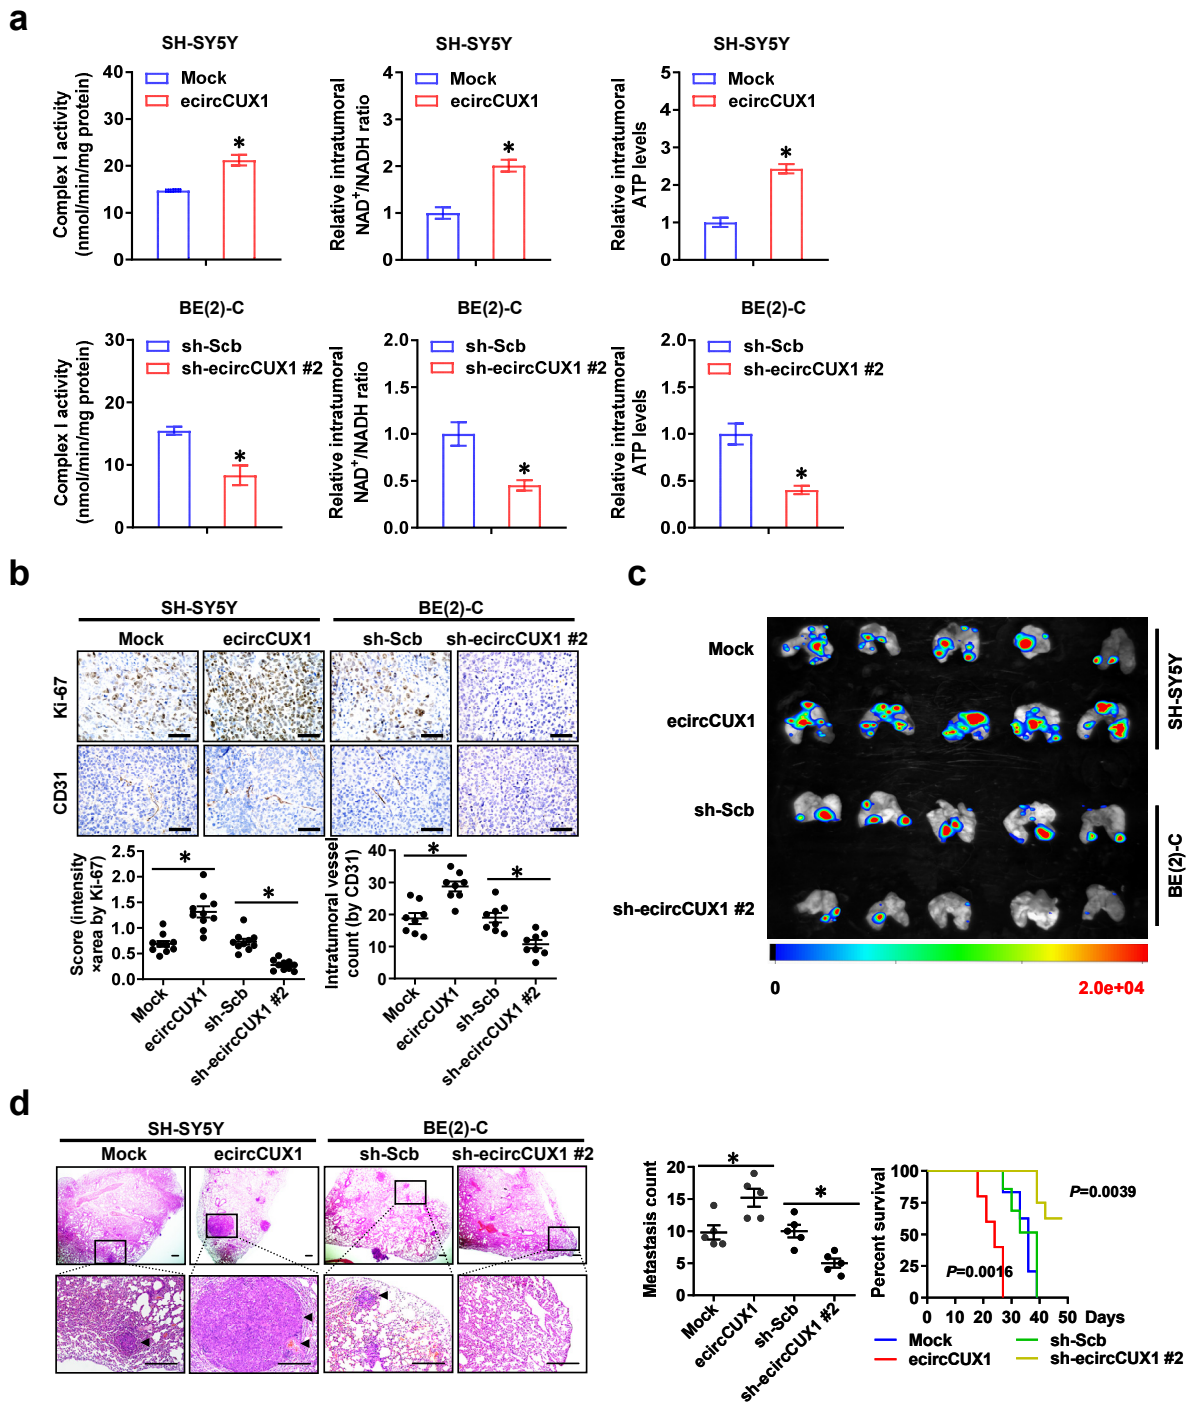

**Supplementary Figure S5. *ecircCUX1* facilitates mitochondrial complex I activity and aggressiveness of NB *in vivo*.** **a** Relative complex I activity,  $\text{NAD}^+/\text{NADH}$  ratio, ATP levels within xenografts in nude mice formed by subcutaneous injection of SH-SY5Y and BE(2)-C cells stably transfected with empty vector (mock), *ecircCUX1*, scramble shRNA (sh-Scb), or sh-*ecircCUX1* #2 ( $n=5$  for each group). **b** Representative images (upper panel) and quantification (lower panel) of immunohistochemical staining showing the expression of Ki-67 and CD31 within xenografts formed by subcutaneous injection of SH-SY5Y and BE(2)-C cells stably transfected with mock, *ecircCUX1*, sh-Scb, or sh-*ecircCUX1* #2 ( $n=5$  for each group). Scale bars: 50  $\mu\text{m}$ . **c** and **d** Representative fluorescence images (c), hematoxylin & eosin staining (d, left panel), lung metastatic counts (d, right panel), and Kaplan–Meier curves (d, right panel) of nude mice treated with tail vein injection of SH-SY5Y and BE(2)-C cells stably transfected with mock, *ecircCUX1*, sh-Scb, or sh-*ecircCUX1* #2 ( $n=5$  for each group). Scale bars: 100  $\mu\text{m}$ . Student's *t* test compared the difference in **a**, **b**, and **d**. Log-rank test for survival comparison in **d**. \* $P < 0.05$  vs. mock or sh-Scb. Data are shown as mean  $\pm$  s.e.m. (error bars) and representative of three independent experiments in **a**.

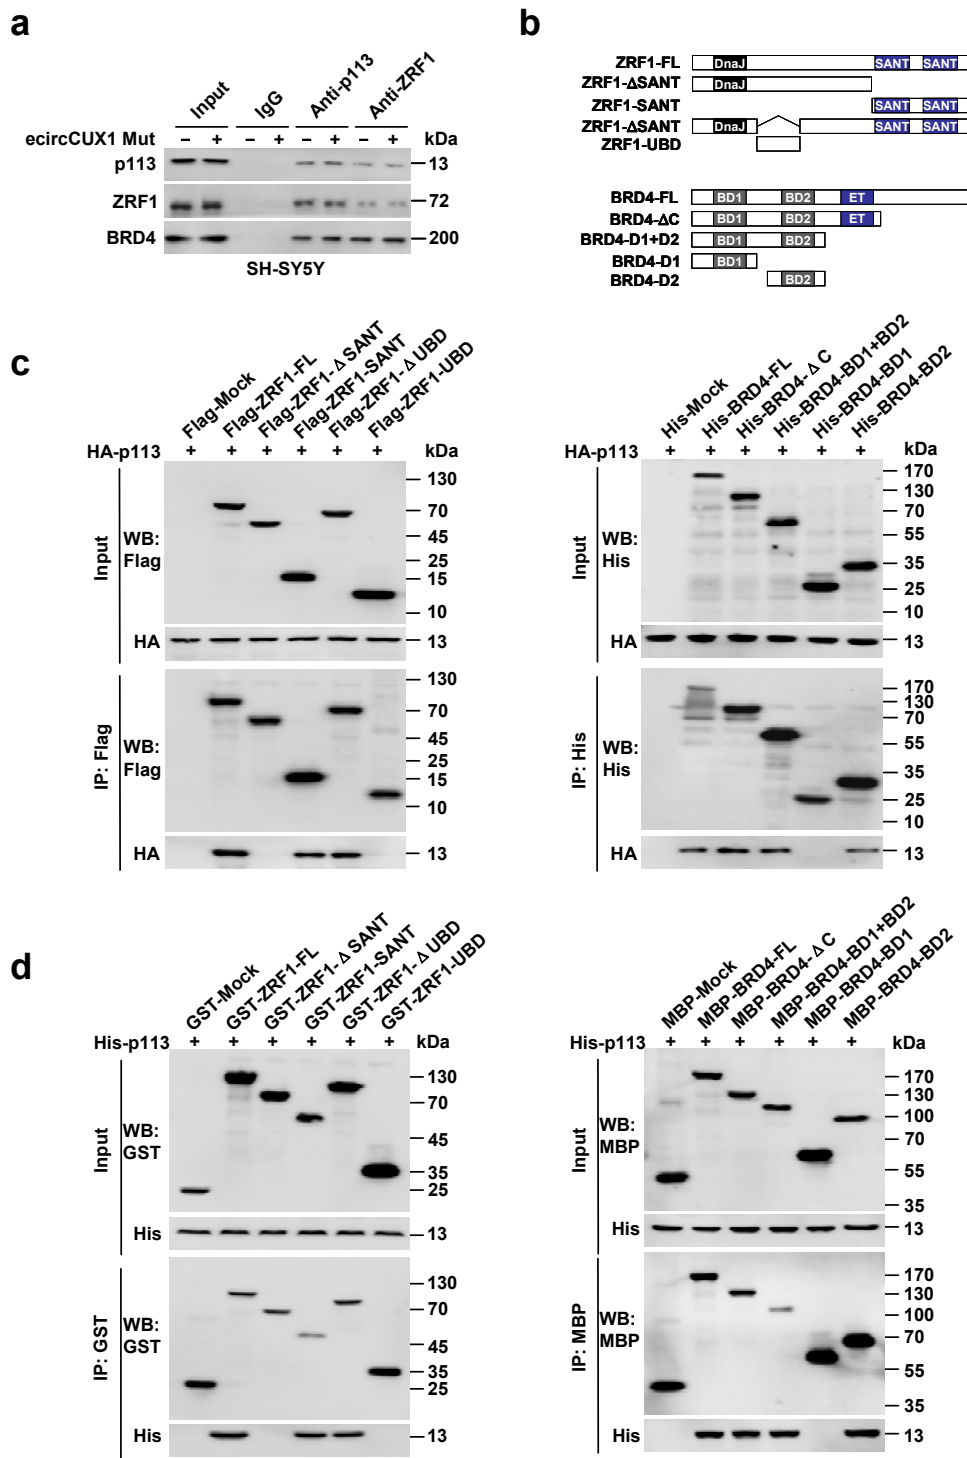

**Supplementary Figure S6. Interaction of p113 with ZRF1 and BRD4 in NB cells.** **a** Co-IP and western blot assays indicating the interaction among p113, ZRF1, and BRD4 in SH-SY5Y cells stably transfected with empty vector (mock) or *ecircCUX1* with ORF mutation (*ecircCUX1* Mut). The immunoglobulin G (IgG)-bound protein was taken as negative control. **b** Schematic illustration revealing domains of ZRF1 and BRD4 protein. **c** and **d** Co-IP and western blot assays showing the interaction of HA-tagged p113 with truncations of Flag-tagged ZRF1 or His-tagged BRD4, as well as His-tagged p113 with recombinant protein of GST-tagged ZRF1 or MBP-tagged BRD4. Data are representative of three independent experiments in **a**, **c** and **d**.

**a**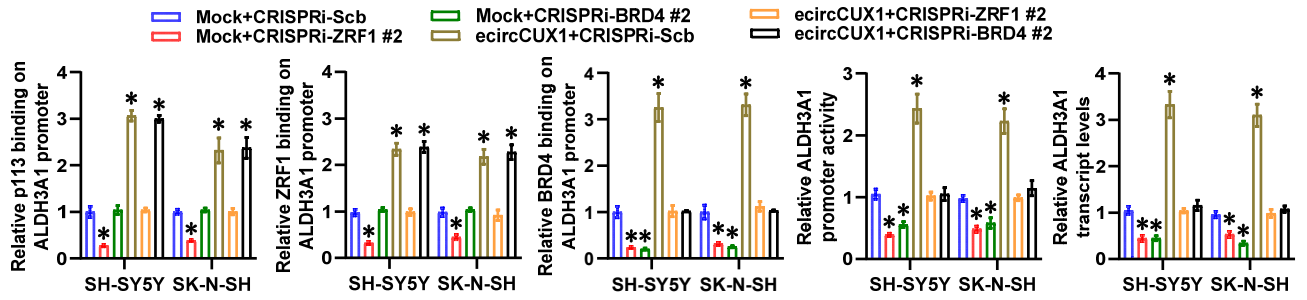**b**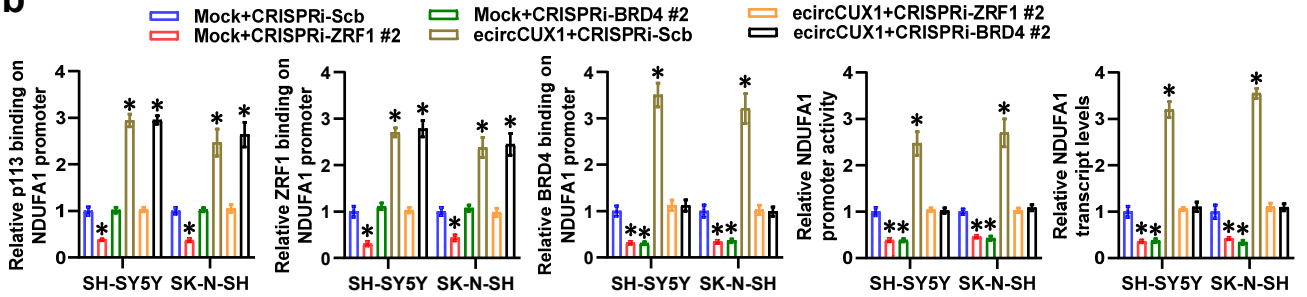**c**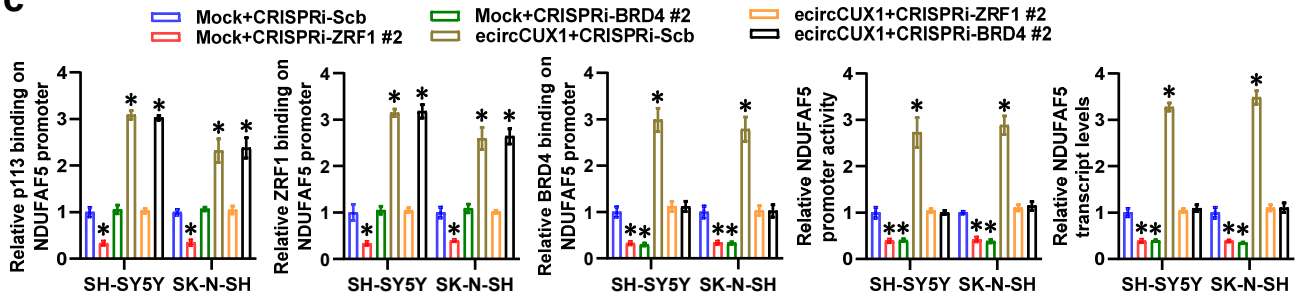

**Supplementary Figure S7. *ecircCUX1* facilitates expression of *ALDH3A1*, *NDUF A1*, or *NDUF A5* in NB cells.** ChIP and qPCR (normalized to input,  $n=5$ ), dual-luciferase ( $n=4$ ), and real-time qRT-PCR (normalized to  $\beta$ -actin,  $n=4$ ) assays indicating the enrichment of p113, ZRF1 and BRD4, promoter activity, and transcript levels of *ALDH3A1* (a), *NDUF A1* (b), or *NDUF A5* (c) in SH-SY5Y and SK-N-SH cells stably transfected with empty vector (mock) or *ecircCUX1*, and those co-transfected with sgRNA specific against *ZRF1* or *BRD4* for CRISPRi. ANOVA compared the difference in **a-c**. \* $P < 0.05$  vs. mock+CRISPRi-Scb. Data are shown as mean  $\pm$  s.e.m. (error bars) and representative of three independent experiments in **a-c**.

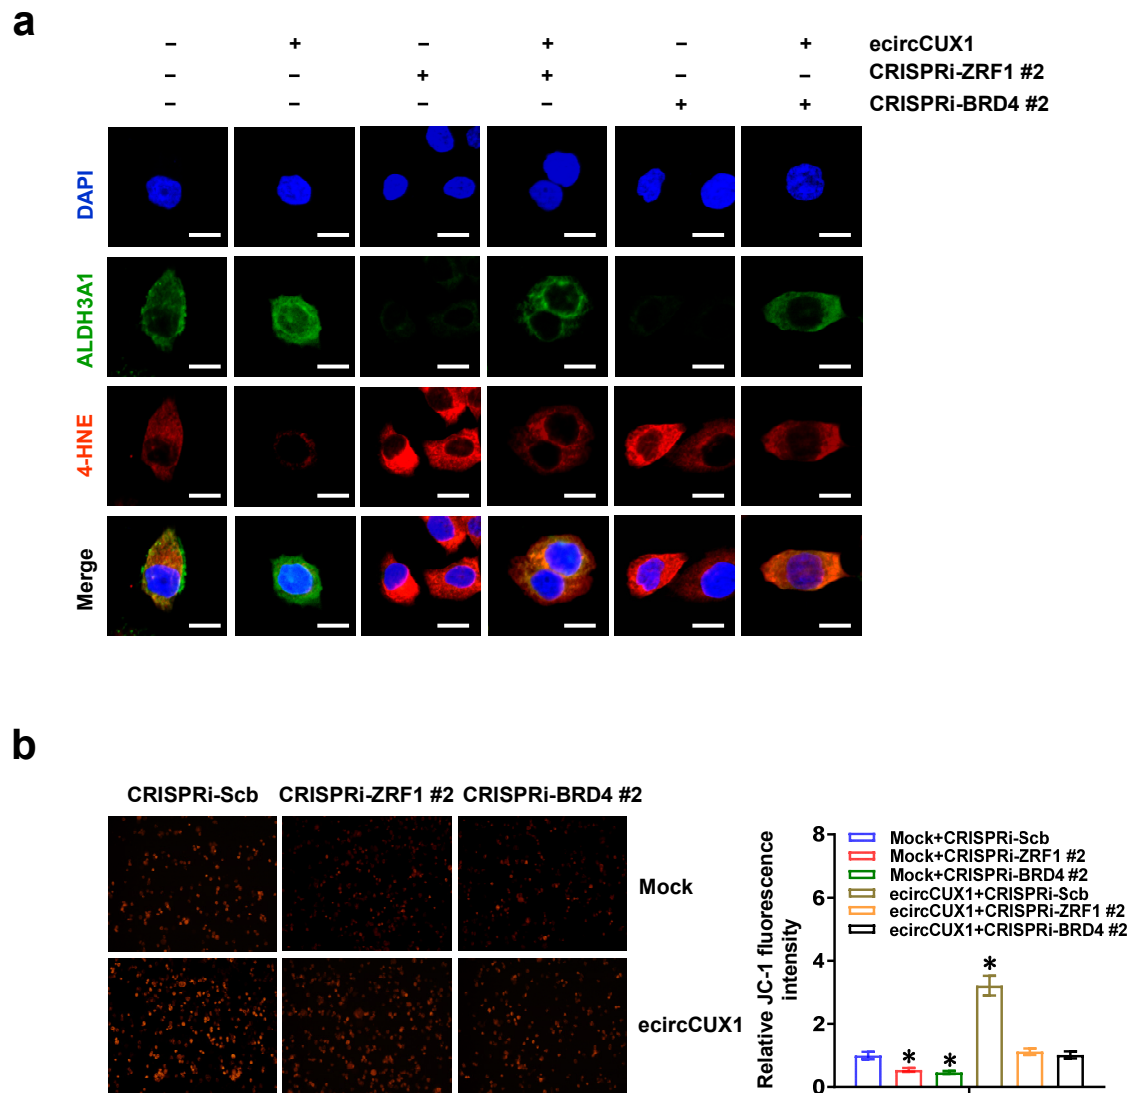

**Supplementary Figure S8. *ecircCUX1* reduces peroxidated lipids and increases mitochondrial membrane potential via ZRF1 or BRD4 in NB cells.** **a** Representative confocal images showing the expression of ALDH3A1 and 4-HNE in SH-SY5Y cells stably transfected with empty vector (mock) or *ecircCUX1*, and those co-transfected with sgRNA specific against *ZRF1* or *BRD4* for CRISPRi. **b** Representative images (left panel) and quantification (right panel) of JC-1 staining in SH-SY5Y cells stably transfected with mock or *ecircCUX1*, and those co-transfected with sgRNA specific against *ZRF1* or *BRD4* for CRISPRi. ANOVA compared the difference in **b**. \* $P < 0.05$  vs. mock+CRISPRi-Scb. Data are shown as mean  $\pm$  s.e.m. (error bars) and representative of three independent experiments in **a** and **b**.

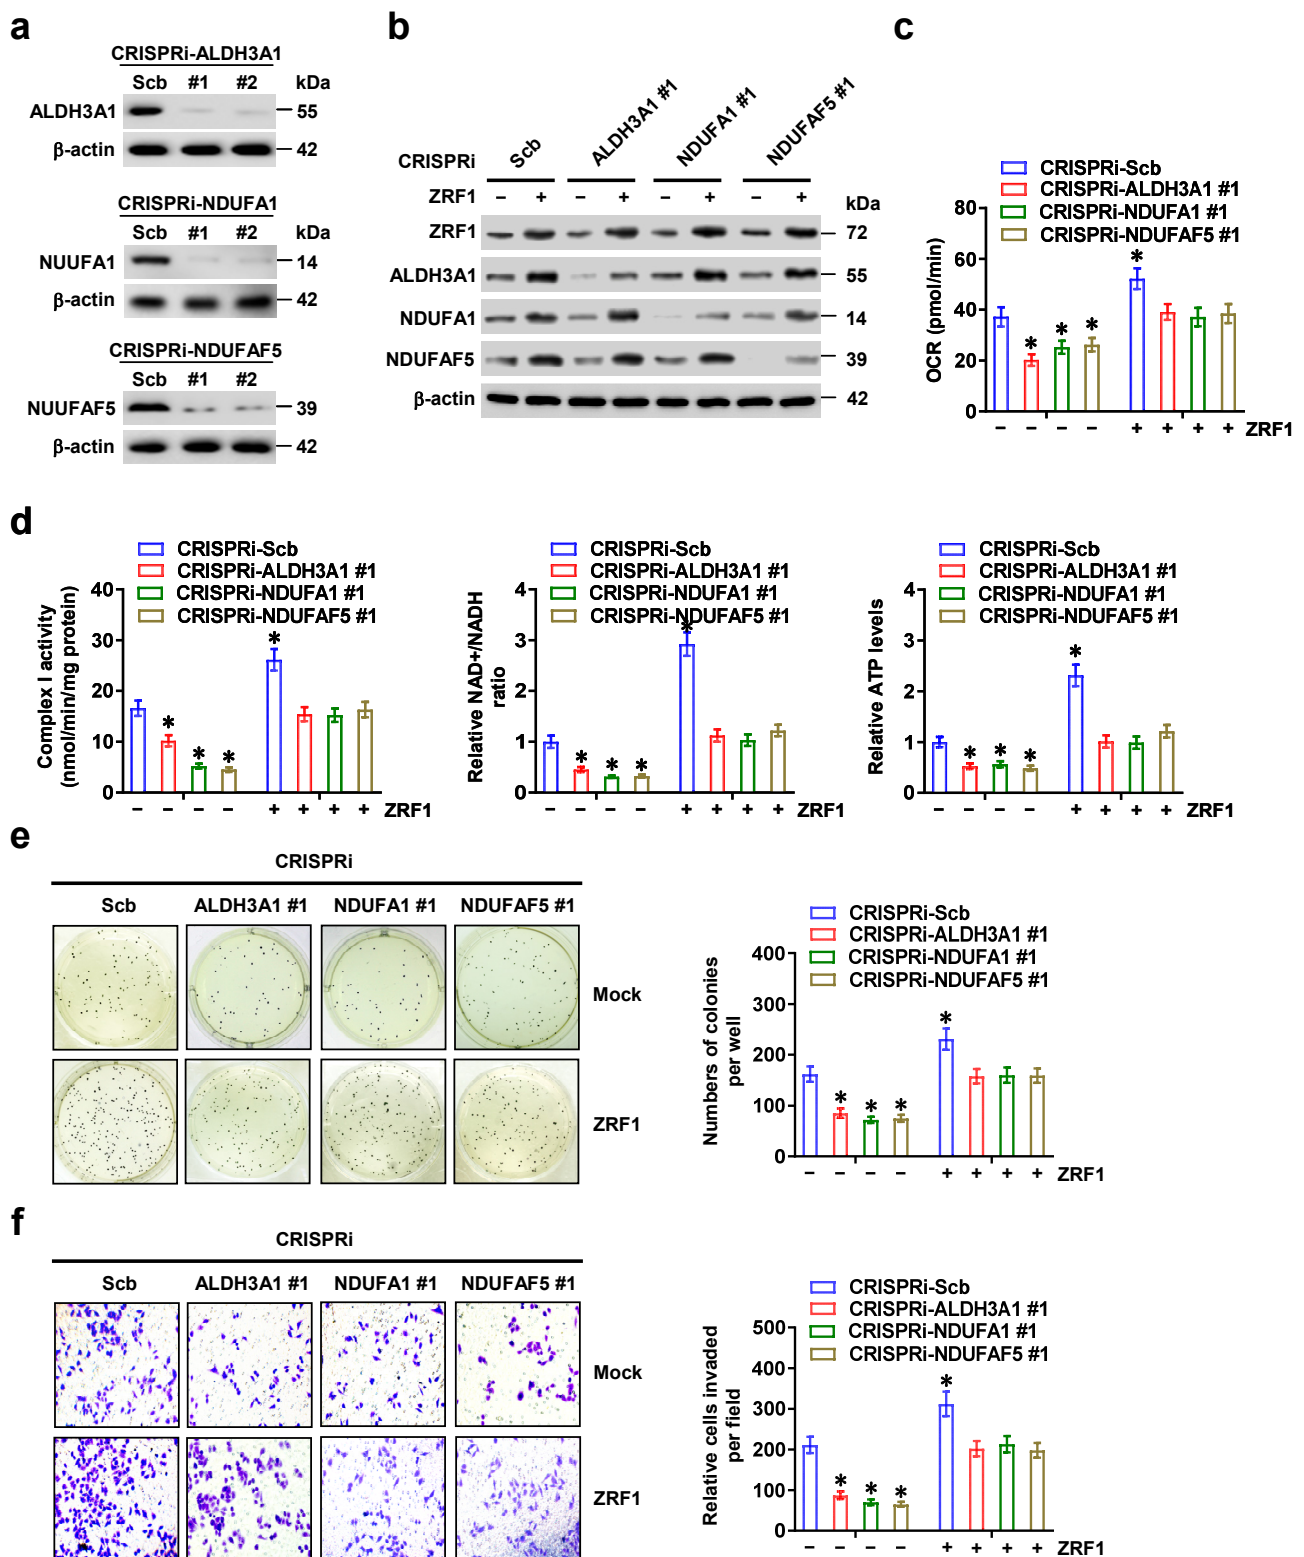

**Supplementary Figure S9. *ZRF1* promotes mitochondrial complex I activity, growth, and aggressiveness of NB cells via target genes.** **a** and **b** Western blot assay showing the levels of *ZRF1*, *ALDH3A1*, *NDUFA1*, or *NDUFAF5* in BE(2)-C cells stably transfected with sgRNA specific against *ALDH3A1*, *NDUFA1*, or *NDUFAF5* for CRISPRi, and those co-transfected with empty vector (mock) or *ZRF1*. **c** and **d** Relative OCR levels (**c**), complex I activity, NAD<sup>+</sup>/NADH ratio, ATP levels (**d**) in BE(2)-C cells stably transfected with mock or *ZRF1*, and those co-transfected with sgRNA specific against *ALDH3A1*, *NDUFA1*, or *NDUFAF5* for CRISPRi. **e** and **f** Representative images (left panel) and quantification (right panel) of soft agar (**e**) and matrigel invasion (**f**) assays indicating the anchorage-independent growth and invasion of BE(2)-C cells stably transfected with mock or *ZRF1*, and those co-transfected with sgRNA specific against *ALDH3A1*, *NDUFA1*, or *NDUFAF5* for CRISPRi. ANOVA compared the difference in **c-f**. \**P* < 0.05 vs. mock+CRISPRi-Scb. Data are shown as mean ± s.e.m. (error bars) and representative of three independent experiments in **a-f**.

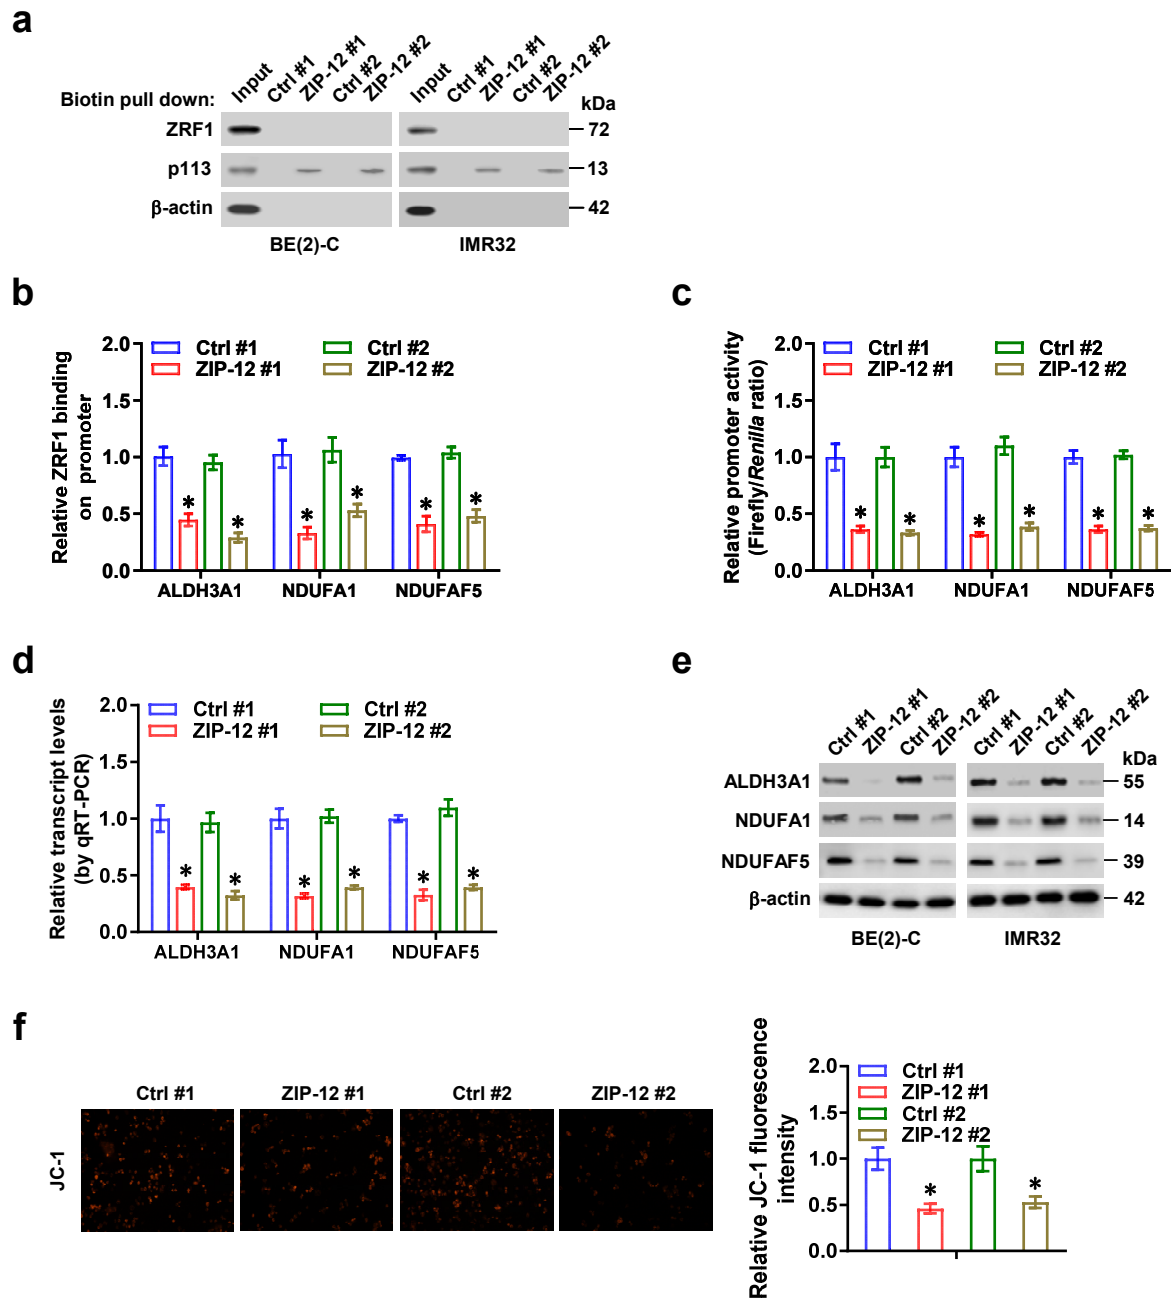

**Supplementary Figure S10. Effects of inhibitory peptides blocking p113-ZRF1 interaction.** **a** Biotin-labeled peptide pull-down and western blot assays showing the binding of mutant control (Ctrl) or ZIP-12 peptides ( $20 \mu\text{mol}\cdot\text{L}^{-1}$ ) to p113 within lysates of BE(2)-C and IMR32 cells. **b-e** ChIP and qPCR (**b**, normalized to input,  $n=5$ ), dual-luciferase (**c**,  $n=4$ ), real-time qRT-PCR (**d**, normalized to  $\beta\text{-actin}$ ,  $n=4$ ), and western blot (**e**) assays showing the ZRF1 enrichment, promoter activity, and expression levels of *ALDH3A1*, *NDUF A1*, or *NDUF A5* in BE(2)-C cells treated with mutant control (Ctrl) or ZIP-12 peptides ( $20 \mu\text{mol}\cdot\text{L}^{-1}$ ) for 24 hrs. **f** Representative images (left panel) and quantification (right panel) of JC-1 staining in BE(2)-C cells treated with mutant control (Ctrl) or ZIP-12 peptides ( $20 \mu\text{mol}\cdot\text{L}^{-1}$ ) for 24 hrs. Student's *t* test compared the difference in **b-d** and **f**. \* $P<0.05$  vs. Ctrl. Data are shown as mean  $\pm$  s.e.m. (error bars) and representative of three independent experiments in **a-f**.

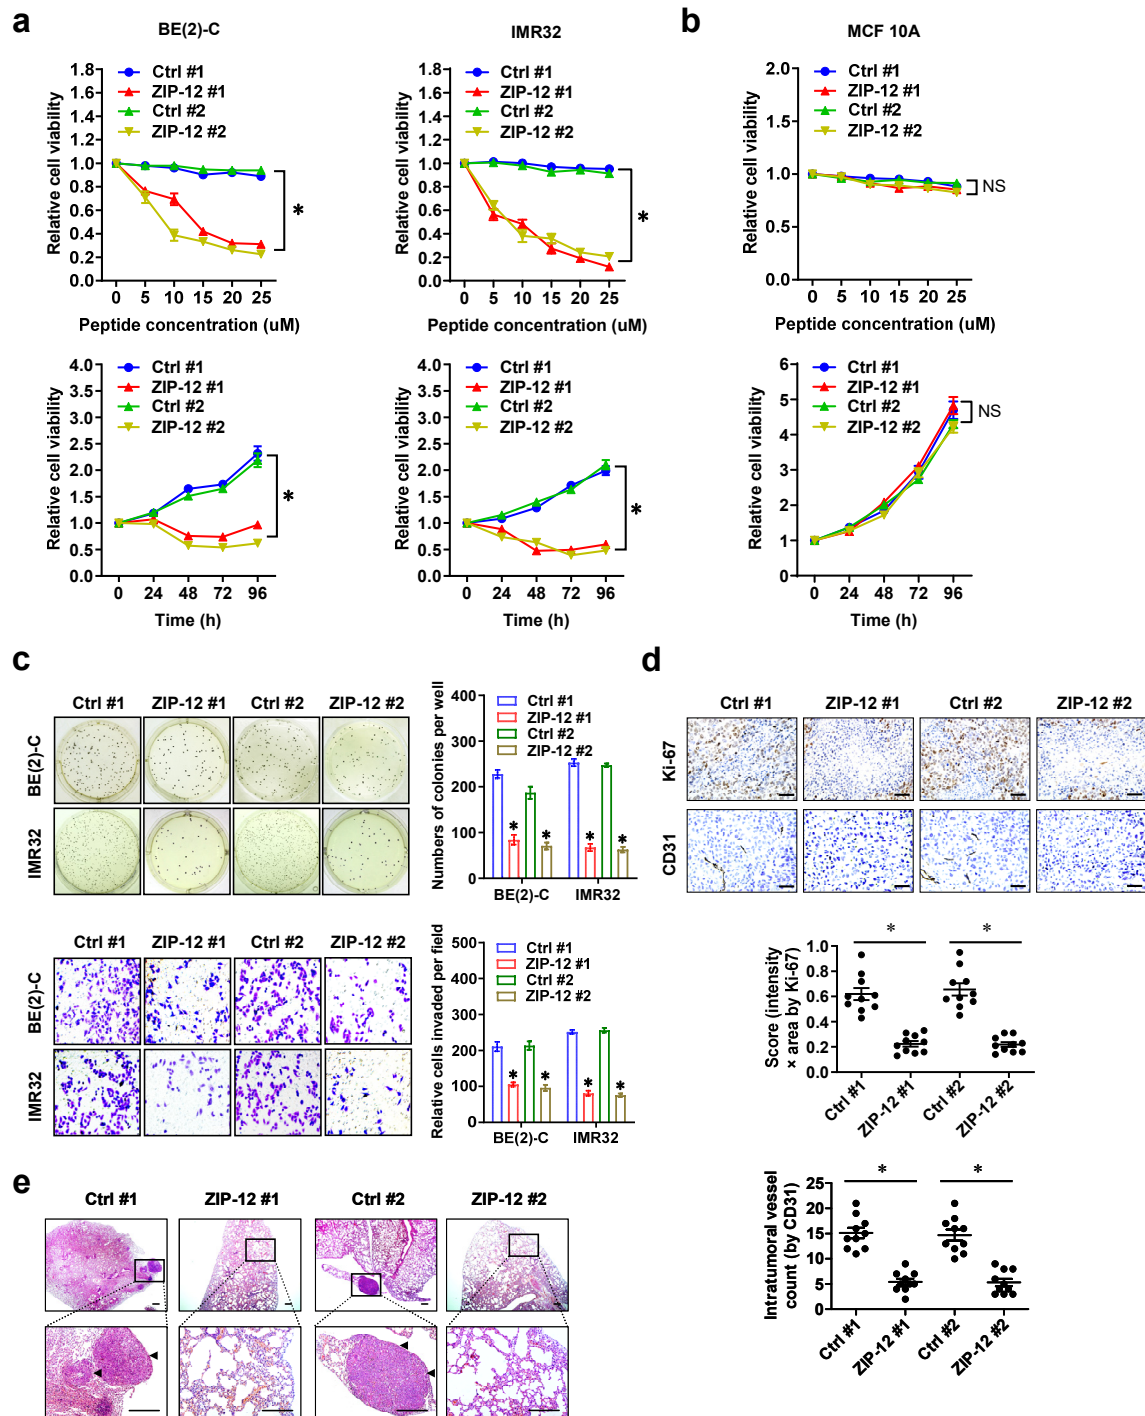

**Supplementary Figure S11. ZIP-12 inhibits viabilities, growth, invasion, and metastasis of NB cells.** **a** and **b** MTT colorimetric assay showing the viabilities of BE(2)-C, IMR32 (**a**), and MCF 10A (**b**) cells treated with mutant control (Ctrl) or ZIP-12 peptides as indicated. **c** Representative images (left panel) and quantification (right panel) of soft agar and matrigel invasion assays indicating the anchorage-independent growth and invasion of BE(2)-C and IMR-32 cells treated with Ctrl or ZIP-12 ( $20 \mu\text{mol}\cdot\text{L}^{-1}$ ) for 48 hrs. **d** Representative images (upper panel) and quantification (lower panel) of immunohistochemical staining showing the expression of Ki-67 and CD31 within subcutaneous xenografts formed by injection of BE(2)-C cells in nude mice ( $n=5$  per group) that were treated with intravenous injection of Ctrl or ZIP-12 peptides ( $5 \text{ mg}\cdot\text{kg}^{-1}$ ). **e** Hematoxylin & eosin staining indicating lung metastatic colonization of nude mice ( $n=5$  for each group) treated with tail vein injection of BE(2)-C cells, Ctrl or ZIP-12 peptides ( $5 \text{ mg}\cdot\text{kg}^{-1}$ ). Scale bars:  $100 \mu\text{m}$ . ANOVA and Student's *t* test compared the difference in **a-d**. \* $P<0.05$  vs. Ctrl. Data are shown as mean  $\pm$  s.e.m. (error bars) in **a-d**.

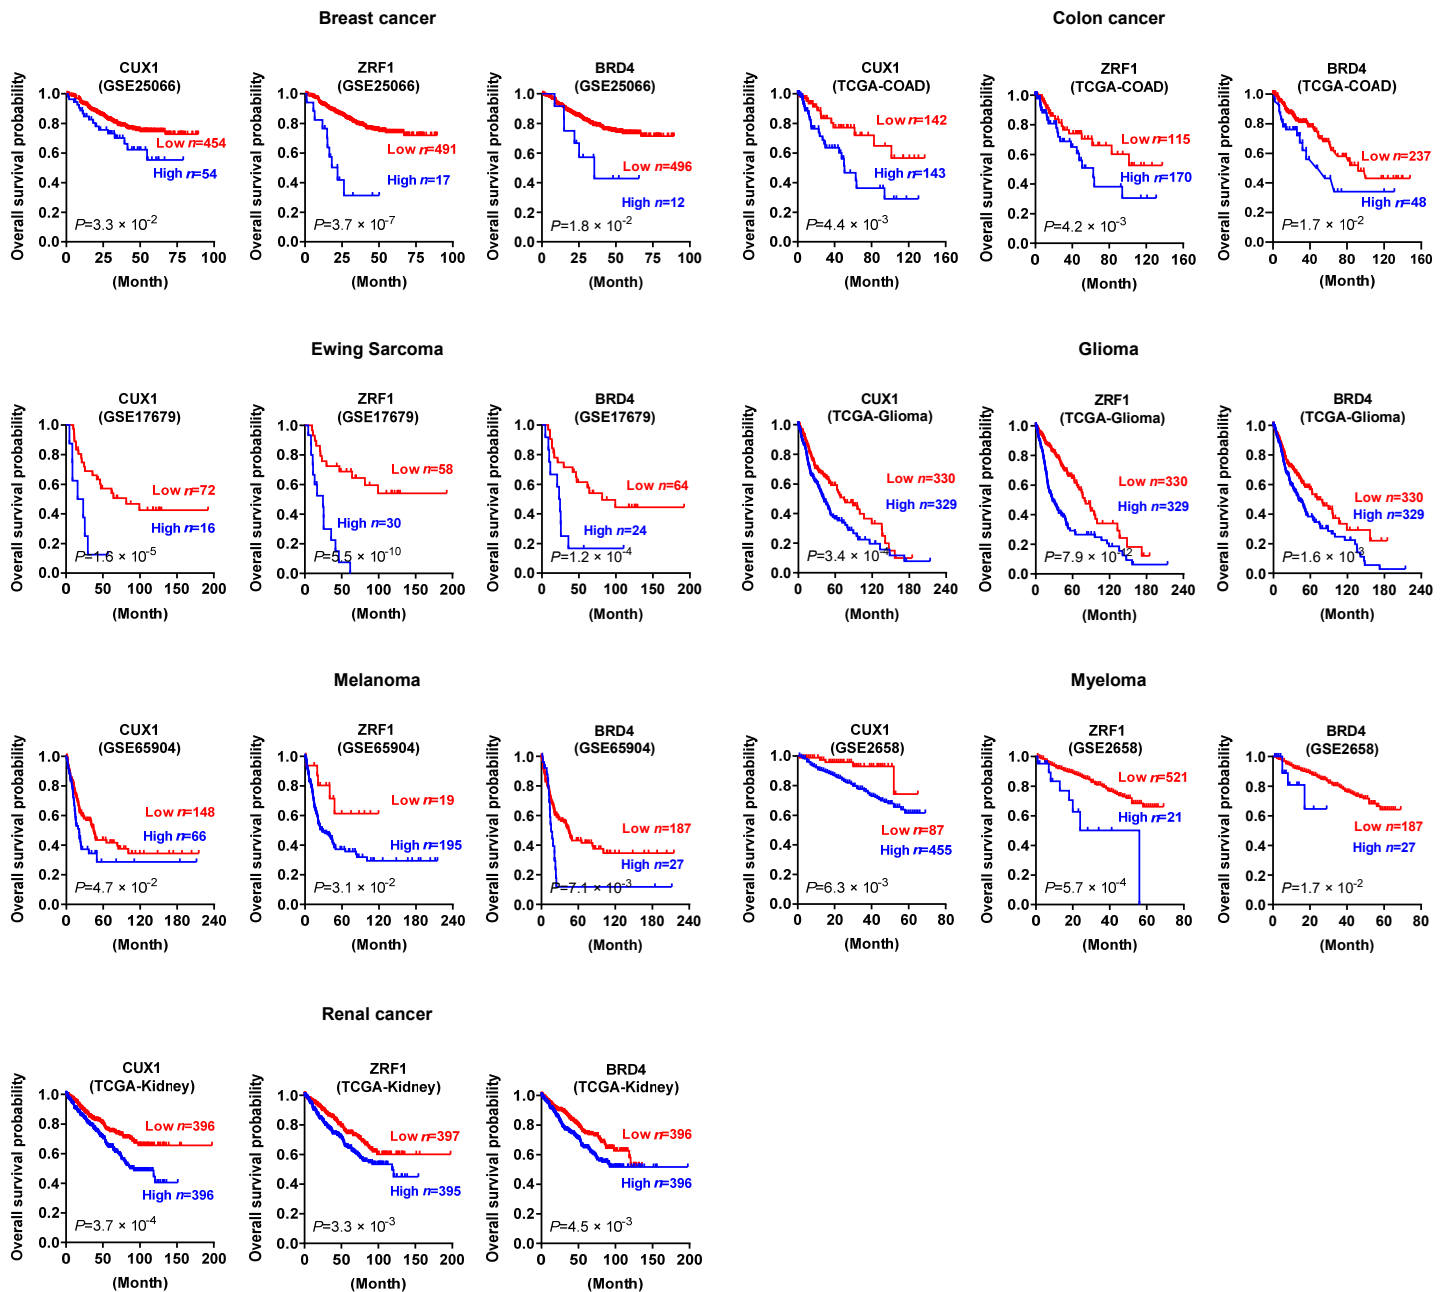

**Supplementary Figure S12. Kaplan-Meier curves of *CUX1*, *ZRF1* and *BRD4* in multiple cancers.** Kaplan-Meier curves indicating the survival of patients with low or high expression of *CUX1*, *ZRF1* or *BRD4* in breast cancer (cutoff values=7.196, 8.617, and 9.531), colon cancer (cutoff values=11.456, 10.152, and 11.104), Ewing sarcoma (cutoff values=7.962, 8.995, and 9.042), glioma (cutoff values=3.324, 2.471, and 3.201), melanoma (cutoff values=7.227, 7.379, and 7.416), myeloma (cutoff values=7.153, 9.059, and 9.381), or renal cancer (cutoff values=3.198, 2.448, and 3.021).

**Supplementary Table S1 Primer sets used for RT-PCR, qPCR and ChIP**

| Primer set                     | Primers | Sequence                       | Product size (bp) | Application    |
|--------------------------------|---------|--------------------------------|-------------------|----------------|
| ecircCUX1<br>(Divergent)       | Forward | 5'-CGCTCCAGCCTAGAAGTTGAGT-3'   | 220               | RT-PCR         |
|                                | Reverse | 5'-TGCCCTCTGGTTTGCCCTTTCA-3'   |                   |                |
| ecircCUX1<br>(Convergent)      | Forward | 5'-CTCAGAGAGAGGCGGAGACC-3'     | 280               | RT-PCR         |
|                                | Reverse | 5'-TTGAGTGTGCTGTTTTTGGC-3'     |                   |                |
| $\beta$ -actin<br>(Convergent) | Forward | 5'-TGCCCATCTACGAGGGGTATG-3'    | 156               | RT-PCR<br>qPCR |
|                                | Reverse | 5'-TCTCCTTAATGTCACGCACGATTT-3' |                   |                |
| $\beta$ -actin<br>(Divergent)  | Forward | 5'-AAATCGTGCGTGACATTAAGGAGA-3' | -                 | RT-PCR         |
|                                | Reverse | 5'-CATACCCCTCGTAGATGGGCA-3'    |                   |                |
| GAPDH                          | Forward | 5'-AGAAGGCTGGGGCTCATTTG-3'     | 258               | qPCR           |
|                                | Reverse | 5'-AGGGGCCATCCACAGTCTTC-3'     |                   |                |
| U1                             | Forward | 5'-ACTTACCTGGCAGGGGAGATACC-3'  | 137               | qPCR           |
|                                | Reverse | 5'-CCACTACCACAAATTATGCAGTCG-3' |                   |                |
| CUX1                           | Forward | 5'-CCAGAGCCTGAACAGACTATTT-3'   | 283               | qPCR           |
|                                | Reverse | 5'-CTTTAAGGCAGGGTTCGAGGGCA-3'  |                   |                |
| ecircCUX1 Flag KI              | Forward | 5'-CTTGGCAGGACATGCTGTATTT-3'   | 667               | PCR            |
|                                | Reverse | 5'-CTGTCATGGATGCCACAGCTAC-3'   |                   |                |
| ALDH3A1                        | Forward | 5'-CCTGCACAAGAATGAATGGA-3'     | 210               | qPCR           |
|                                | Reverse | 5'-GTGAGGTTGAAGGGGTAGTT-3'     |                   |                |
| NDUFA1                         | Forward | 5'-TTCGAGATTCTCCCCGGACT-3'     | 182               | qPCR           |
|                                | Reverse | 5'-GACACATAGTAACGATCAAC-3'     |                   |                |
| NDUFAF5                        | Forward | 5'-ACCTGGGACATCTGCTTGGG-3'     | 159               | qPCR           |
|                                | Reverse | 5'-CTCGATGCAGCAGGGCTTTT-3'     |                   |                |
| ALDH3A1<br>(-333/-151)         | Forward | 5'-GCAAGTCTGGAAAGCTGGAAGA-3'   | 183               | ChIP           |
|                                | Reverse | 5'-CCCAGGTTTTGGGGATTAGGTC-3'   |                   |                |
| NDUFA1<br>(-648/-388)          | Forward | 5'-GCTGCGCTCAAAGATGGCTTGT-3'   | 261               | ChIP           |
|                                | Reverse | 5'-TGCACTGTGGTTCGACCGGAAA-3'   |                   |                |
| NDUFAF5<br>(-333/-63)          | Forward | 5'-AAGACTGAAGAATGAGACCGAA-3'   | 271               | ChIP           |
|                                | Reverse | 5'-AGGGAACGTGCAAGTAGTTTGG-3'   |                   |                |

CUX1, cut like homeobox 1; ecircCUX1, exonic circular RNA derived from CUX1; GAPDH, glyceraldehyde 3-phosphate dehydrogenase; KI, Knock in; ALDH3A1, aldehyde dehydrogenase 3 family member A1; NDUFA1, NADH:ubiquinone oxidoreductase subunit A1; NDUFAF5, NADH:ubiquinone oxidoreductase complex assembly factor 5; RT-PCR: reverse transcription PCR; qPCR: quantitative PCR; ChIP, chromatin immunoprecipitation.

**Supplementary Table S2    Oligonucleotide sets used for constructs**

| <b>Primer Set</b>        | <b>Sequences</b>                                                                                                                                |
|--------------------------|-------------------------------------------------------------------------------------------------------------------------------------------------|
| pLenti-ecircCUX1         | 5'-CCGGAATTCCTGAAATATGCTATCTTACAGGGCCGACGAGATTGAAATGA-3' (sense);<br>5'-CGCGGATCCTCAAGAAAAATATATCACTTTGAGTGTGCTGTTTTTGG-3' (antisense)          |
| pcDNA3.1-p113            | 5'-CGCGGATCCCAAAGTGCTGAGATTACAGGCGT-3' (sense);<br>5'-CTAGCTAGCTGCTGGGATTACAGGTGTGAGCT-3' (antisense)                                           |
| ecircCUX1-3Flag          | 5'-GGACTACAAAGATGATGACGATAAATGAAATGATCATGACGGACCTTG-3' (sense);<br>5'-CTTATCGTCGTCATCCTTGTAATCATCTCGTCGGCCCTGGTACCGCC-3' (antisense)            |
| ecircCUX1 Mut 1          | 5'-CACACTCAAACCAAGAAGCAAGGAAAAAGAATTAGGCTCGGCAC-3' (sense);<br>5'-CCTTGCTTCTTGTTTTGAGTGTGCTGTTTTTGGCGCTCAGCTG-3' (antisense)                    |
| ecircCUX1 Mut 2          | 5'-GCACACTCAACAGTAAGAAGCAAGGAAAAAGAATTAGGCTCGG-3' (sense);<br>5'-TGCTTCTTACTGTTGAGTGTGCTGTTTTTGGCGCTCAGCTGC-3' (antisense)                      |
| ecircCUX1 Mut 3          | 5'-TAAATGAAATCATCGTGACGGACCTTGAAAGGGCAAACCAGAGGGC-3' (sense);<br>5'-AAGGTCCGTCACGATGATTTTATTTATCGTCATCATCTTTGTAGTC-3' (antisense)               |
| ecircCUX1 Mut 4          | 5'-GATCATGACGTAGCTTGAAGGGCAAACCAGAGGGCAGAGGTGG-3' (sense);<br>5'-GCCCTTTCAAGCTACGTCATGATCATTTTCATTTATCGTCATCAT-3' (antisense)                   |
| ecircCUX1-IRES-1         | 5'-TTCTCAAAAATGAACAATAAGGATCCGAGTTGGCCGCCAAGGAGCGGG-3' (sense);<br>5'-ATGTTTTTGGCGTCTTCCATGAATTCTGCTGTTTTTGGCGCTCAGCTG-3' (antisense)           |
| ecircCUX1-IRES-2         | 5'-TTCTCAAAAATGAACAATAAGGATCCGAGGACGTGCAGAGACTCCAG-3' (sense);<br>5'-ATGTTTTTGGCGTCTTCCATGAATTCTGAGTGTGCTGTTTTTGGCGCT-3' (antisense)            |
| p-Luc2-IRES-Reporter     | 5'-GAATTCATGGAAGACGCCAAAAACAT-3' (sense);<br>5'-GGATCCTTATTGTTTATTTTGGAGAA-3' (antisense)                                                       |
| IGF1R IRES               | 5'-CGCGGATCCCGCCTTCGGAGTATTGTTTCC-3' (sense);<br>5'-CCGGAATTCCTTTTTATTTGGGATGAAATCCC-3' (antisense)                                             |
| pLenti-ZRF1              | 5'-CTTGGGCTGCAGGTCGACTCTAGAGGATCCATGCTGCTTCTGCCAAGCGCCGC-3' (sense);<br>5'-GTCATCGTCATCCTTGTAGTCCATACCGGTTTTCTTGGCTCTACTTGCATTCA-3' (antisense) |
| pLenti-BRD4              | 5'-CTTGGGCTGCAGGTCGACTCTAGAGGATCCATGCTGCGGAGAGCGGCCCTGG-3' (sense);<br>5'-GTCATCGTCATCCTTGTAGTCCATACCGGTGAAAGATTTTCTTCAAATATTG-3' (antisense)   |
| pGL3-ZRF1 luc            | 5'-CGTCAAGCATAGTCAAGCTATGTCAAGCATAGTCAAGCA-3' (sense);<br>5'-AGCTTGCTTGACTATGCTTGACATAGCTTGACTATGCTTGACGGTAC-3' (antisense)                     |
| pBiFC-VC155-p113         | 5'-ATGGCCATGGAGGCCGAATTCGGATGATCATGACGGACCTTGAAAG-3' (sense);<br>5'-TTTTGCACGCCGACGGGTACCATCTCGTCGGCCTTTGAGTG-3' (antisense)                    |
| pBiFC-VC155-ZRF1         | 5'-ATGGCCATGGAGGCCGAATTCGGATGCTGCTTCTGCCAAGCGCCGC-3' (sense);<br>5'-TTTTGCACGCCGACGGGTACCTTTCTTGGCTCTACTTGCAATTCA-3' (antisense)                |
| pBiFC-VN173-ZRF1         | 5'-ACAAGCTTGCGGCCGCGAATTCATGCTGCTTCTGCCAAGCGCCGC-3' (sense);<br>5'-TCTTCTAGAGTCGACTGGTACCCCTTTCTTGGCTCTACTTGCAATTCA-3' (antisense)              |
| pBiFC-VN173-BRD4         | 5'-ACAAGCTTGCGGCCGCGAATTCATGCTGCTGCGGAGAGCGGCCCTGGGA-3' (sense);<br>5'-TCTTCTAGAGTCGACTGGTACCCCGAAAGATTTTCTTCAAATATTGAC-3' (antisense)          |
| pCMV-HA-p113             | 5'-GCCGCTCGAGCCGCCACCATGATCATGACGGACCTTGAAA-3' (sense);<br>5'-ATTTGCGGCCGCATCTCGTCGGCCTTTGAGTGTGCTGTTTTTGGCG-3' (antisense)                     |
| pET-28A-p113             | 5'-CGCGGATCCATGATCATGACGGACCTTGAAA-3' (sense);<br>5'-GCCGCTCGAGATCTCGTCGGCCTTTGAGTGTG-3' (antisense)                                            |
| pCMV-3Tag-1A-ZRF1-FL     | 5'-CGCGGATCCATGCTGCTTCTGCCAAGCGCCGC-3' (sense);<br>5'-GCCGCTCGAGTTTCTTGGCTCTACTTGCAATTCA-3' (antisense)                                         |
| pCMV-3Tag-1A-ZRF1-ΔSANT  | 5'-CGCGGATCCATGCTGCTTCTGCCAAGCGCCGC-3' (sense);<br>5'-GCCGCTCGAGATTTCCACCTCCACAGTTGATT-3' (antisense)                                           |
| pCMV-3Tag-1A-ZRF1-SANT   | 5'-CGCGGATCCGGAAGTAAAAATTGGTCAGAAGA-3' (sense);<br>5'-GCCGCTCGAGTTTCTTGGCTCTACTTGCAATTCA-3' (antisense)                                         |
| pCMV-3Tag-1A-ZRF1-ΔUBD-1 | 5'-CGCGGATCCAACAGAGCAACAAGAGCACAAA-3' (sense);<br>5'-ACTGTTAAATGCTCGTCTTTTCA-3' (antisense)                                                     |
| pCMV-3Tag-1A-ZRF1-ΔUBD-2 | 5'-CGCGGATCCGTAGATCCTACTTTTGATAACTC-3' (sense);<br>5'-GCCGCTCGAGTTTCTTGGCTCTACTTGCAATTCA-3' (antisense)                                         |
| pCMV-3Tag-1A-ZRF1-UBD    | 5'-CGCGGATCCGTAGATCCTACTTTTGATAACTC-3' (sense);<br>5'-GCCGCTCGAGCTGCTTTTCAATCCATCTCCTCT-3' (antisense)                                          |
| pCDNA4-His-BRD4-ΔC       | 5'-CGCGGATCCATGTCTGCGGAGAGCGGCCCTGG-3' (sense);<br>5'-GCCGCTCGAGGTGCCCTTCTTTTTGACTTCG-3' (antisense)                                            |
| pCDNA4-His-BRD4-BD1+BD2  | 5'-CGCGGATCCATGTCTGCGGAGAGCGGCCCTGG-3' (sense);<br>5'-GCCGCTCGAGAGGAGACACGGCCACCACTGGCT-3' (antisense)                                          |
| pCDNA4-His-BRD4-BD1      | 5'-CGCGGATCCATGTCTGCGGAGAGCGGCCCTGG-3' (sense);<br>5'-GCCGCTCGAGAGTTGTGTTTGGTACCGTGAAA-3' (antisense)                                           |
| pCDNA4-His-BRD4-BD2      | 5'-CGCGGATCCCCCCCCGAGTGCCCCCAGCC-3' (sense);<br>5'-GCCGCTCGAGGGAGGACACGGCCACCACTGGCT-3' (antisense)                                             |
| pGEX-6P-1-ZRF1-FL        | 5'-CGCGGATCCATGCTGCTTCTGCCAAGCGCCGC-3' (sense);<br>5'-GCCGCTCGAGTTTCTTGGCTCTACTTGCAATTCA-3' (antisense)                                         |
| pGEX-6P-1-ZRF1-ΔSANT     | 5'-CGCGGATCCATGCTGCTTCTGCCAAGCGCCGC-3' (sense);<br>5'-GCCGCTCGAGATTTCCACCTCCACAGTTGATT-3' (antisense)                                           |
| pGEX-6P-1-ZRF1-SANT      | 5'-CGCGGATCCGGAAGTAAAAATTGGTCAGAAGA-3' (sense);<br>5'-GCCGCTCGAGTTTCTTGGCTCTACTTGCAATTCA-3' (antisense)                                         |
| pGEX-6P-1-ZRF1-ΔUBD-1    | 5'-CGCGGATCCATGCTGCTTCTGCCAAGCGCCGC-3' (sense);<br>5'-ACTGTTAAATGCTCGTCTTTTCA-3' (antisense)                                                    |
| pGEX-6P-1-ZRF1-ΔUBD-2    | 5'-CGCGGATCCGTAGATCCTACTTTTGATAACTC-3' (sense);<br>5'-GCCGCTCGAGTTTCTTGGCTCTACTTGCAATTCA-3' (antisense)                                         |
| pGEX-6P-1-ZRF1-UBD       | 5'-CGCGGATCCGTAGATCCTACTTTTGATAACTC-3' (sense);<br>5'-GCCGCTCGAGCTGCTTTTCAATCCATCTCCTCT-3' (antisense)                                          |

|                       |                                                                                                         |
|-----------------------|---------------------------------------------------------------------------------------------------------|
| pMAL-c4X-BRD4-FL      | 5'-CGCGGATCCATGTCTGCGGAGAGCGGCCCTGG-3' (sense);<br>5'-CCCAAGCTTGAAAAGATTTTCTTCAAATATTG-3' (antisense)   |
| pMAL-c4X-BRD4-ΔC      | 5'-CGCGGATCCATGTCTGCGGAGAGCGGCCCTGG-3' (sense);<br>5'-CCCAAGCTTGTGCCCCCTTCTTTTTGACTTCG-3' (antisense)   |
| pMAL-c4X-BRD4-BD1+BD2 | 5'-CGCGGATCCATGTCTGCGGAGAGCGGCCCTGG-3' (sense);<br>5'-CCCAAGCTTGGAGGACACGGCCACCACTGGCT-3' (antisense)   |
| pMAL-c4X-BRD4-BD1     | 5'-CGCGGATCCATGTCTGCGGAGAGCGGCCCTGG-3' (sense);<br>5'-CCCAAGCTTAGTTGTGTTTGGTACCGTGAAA-3' (antisense)    |
| pMAL-c4X-BRD4-BD2     | 5'-CGCGGATCCCCCCCCGCCAGTGCCCCCAGCC-3' (sense);<br>5'-CCCAAGCTTGGAGGACACGGCCACCACTGGCT-3' (antisense)    |
| pGL3-ALDH3A1-promoter | 5'-CTAGCTAGCTGGAGGAAGACGACAGCATTGTGC-3' (sense);<br>5'-CCCAAGCTTAGAGCTGCCAGAGGTCCAGGAGGA-3' (antisense) |
| pGL3-NDUFA1-promoter  | 5'-CTAGCTAGCGGCGACAGATGAAACACTTGAATG-3' (sense);<br>5'-CCCAAGCTTCAAAACCCTACTTCTGGGTCCTTG-3' (antisense) |
| pGL3-NDUFAF5-promoter | 5'-CTAGCTAGCAAGTCTCCAATGGTTTAGCATCTC-3' (sense);<br>5'-CCCAAGCTTACCTCCTCCTTCAGGTAGTCAAAT-3' (antisense) |

---

ecircCUX1, exonic circular RNA derived from CUX1; Mut, mutation; IRES, internal ribosome entry site; IGF1R, insulin like growth factor 1 receptor; BiFC, bimolecular fluorescence complementation; ZRF1, Zuotin-related factor 1; BRD4, bromodomain-containing protein 4; ALDH3A1, aldehyde dehydrogenase 3 family member A1; NDUFA1, NADH:ubiquinone oxidoreductase subunit A1; NDUFAF5, NADH:ubiquinone oxidoreductase complex assembly factor 5.

**Supplementary Table S3      Oligonucleotide sets used for short hairpin RNAs and CRISPR-Cas9/dCas9**

| Oligo Set                | Sequences |                                                                   |
|--------------------------|-----------|-------------------------------------------------------------------|
| sh-Scb                   | Sense     | 5'-CCGGGCGAACGATCGAGTAAACGGACTCGAGTCCGTTTACTCGATCGTTTCGCTTTTT-3'  |
|                          | Antisense | 5'-AATTCAAAAAGCGAACGATCGAGTAAACGGACTCGAGTCCGTTTACTCGATCGTTTCGC-3' |
| sh-ecircCUX1 #1          | Sense     | 5'-CCGGTGACACTCAAAGGCCGACGCTCGAGCGTCGGCCTTTGAGTGTGCTTTTTG-3'      |
|                          | Antisense | 5'-GATCCAAAAAGCACACTCAAAGGCCGACGCTCGAGCGTCGGCCTTTGAGTGTGCA-3'     |
| sh-ecircCUX1 #2          | Sense     | 5'-CCGGTCAGCACACTCAAAGGCCGACTCGAGTCGGCCTTTGAGTGTGCTGTTTTG-3'      |
|                          | Antisense | 5'-GATCCAAAAACAGCACACTCAAAGGCCGACTCGAGTCGGCCTTTGAGTGTGCTGA-3'     |
| sgRNA-KI-p113            | Sense     | 5'-CACCGCATGATCATTTCAATCTCGT-3'                                   |
|                          | Antisense | 5'-AAACACGAGATTGAAATGATCATGC-3'                                   |
| sgRNA-CRISPRi-ZRF1 #1    | Sense     | 5'-CACCGAGGTTACCGCACACGTTGGC-3'                                   |
|                          | Antisense | 5'-AAACGCCAACGTGTGCGGTAACCTC-3'                                   |
| sgRNA-CRISPRi-ZRF1 #2    | Sense     | 5'-CACCGCTTCCGGGATGGATCTTTCG-3'                                   |
|                          | Antisense | 5'-AAACCGAAAGATCCATCCCGGAAGC-3'                                   |
| sgRNA-CRISPRi-BRD4 #1    | Sense     | 5'-CACCGCCGAGGAGCCGAAGCAGTGG-3'                                   |
|                          | Antisense | 5'-AAACCCACTGCTTCGGCTCCTCGGC-3'                                   |
| sgRNA-CRISPRi-BRD4 #2    | Sense     | 5'-CACCGGTTCTGGTCTCCCGCAGCCG-3'                                   |
|                          | Antisense | 5'-AAACCGGCTGCGGGAGACCAGAACC-3'                                   |
| sgRNA-CRISPRi-ALDH3A1 #1 | Sense     | 5'-CACCGTAAATACGTCCCCTCTTGGC-3'                                   |
|                          | Antisense | 5'-AAACGCCAAGAGGGGACGTATTTAC-3'                                   |
| sgRNA-CRISPRi-ALDH3A1 #2 | Sense     | 5'-CACCGGATGGGCCGTCAGACTCCAT-3'                                   |
|                          | Antisense | 5'-AAACATGGAGTCTGACGGCCCATCC-3'                                   |
| sgRNA-CRISPRi-NDUFA1 #1  | Sense     | 5'-CACCGTGGCTACTGCGTACATCCAC-3'                                   |
|                          | Antisense | 5'-AAACGTGGATGTACGCAGTAGCCAC-3'                                   |
| sgRNA-CRISPRi-NDUFA1 #2  | Sense     | 5'-CACCGGGTAAGCCGGCTTCGGCCCG-3'                                   |
|                          | Antisense | 5'-AAACCGGGCCGAAGCCGGCTTACCC-3'                                   |
| sgRNA-CRISPRi-NDUFAF5 #1 | Sense     | 5'-CACCGAGTAGACACAAAAGCCGCGC-3'                                   |
|                          | Antisense | 5'-AAACGCGCGGCTTTTGTGTCTACTC-3'                                   |
| sgRNA-CRISPRi-NDUFAF5 #2 | Sense     | 5'-CACCGGGCGCTTATGTGGCGACCT-3'                                    |
|                          | Antisense | 5'-AAACAGGTCGCCGACATAAGCGCCC-3'                                   |

ecircCUX1, exonic circular RNA derived from CUX1; ZRF1, Zuo1-related factor 1; BRD4, bromodomain-containing protein 4; ALDH3A1, aldehyde dehydrogenase 3 family member A1; NDUFA1, NADH:ubiquinone oxidoreductase subunit A1; NDUFAF5, NADH:ubiquinone oxidoreductase complex assembly factor 5; sgRNA, small guide RNA; KI, knock in; CRISPR, Clustered regularly interspaced short palindromic repeats; CRISPRi, CRISPR-dCas9-mediated interference; dCas9, dead mutant of Cas9 endonuclease; shRNA, short hairpin RNA.

**Supplementary Table S4** Mass spectrometry analysis of proteins altered by serum deprivation

| SH-SY5Y   |                |            |           |           |          |         | SK-N-BE(2)    |           |          |
|-----------|----------------|------------|-----------|-----------|----------|---------|---------------|-----------|----------|
| ABCF1     | CHCHD5         | FAM192A    | HNRPUL1   | NAT10     | PSMD12   | TBCA    | ABHD12        | ISOC1     | SLC5A6   |
| ABCF2     | CHCHD8         | FAM207A    | HOMER1    | NBLA10388 | PSMD3    | TCF3    | ALB           | ITGB6     | SLC7A1   |
| ACP1      | CHEK2          | FAM20B     | HOXC4     | NCAM1     | PSME3    | TFB1M   | ANAPC10       | JAGN1     | SLIT3    |
| ACSS1     | CHMP1A         | FAR1       | HPRT1     | NCAM2     | PTGES3   | TGFB1   | ANO10         | JMJD6     | SMIM4    |
| ADPRHL2   | CHMP2A         | FAU        | HSP90AB2P | NCAPD2    | PYGL     | TIMM8B  | APOE          | KIF11     | SQLE     |
| AGFG1     | CHMP4B         | FDFT1      | HSPA8     | NDUFA4    | RAB30    | TMEM123 | ARHG          | KIF23     | SRC      |
| ALAS1     | CHTOP          | FEAT       | HTATIP    | NEFM      | RABEPK   | TMEM41B | ARPC4-TTLL3   | LENG8     | SSR3     |
| ALB       | CLASP1         | FIS1       | HYAL3     | NIT1      | RABL6    | TMSB10  | B3GNT6        | LOC221955 | STXBP2   |
| ALG1      | CLCN7          | FKBP1A     | HYPK      | NOSTRIN   | RANBP3   | TMUB1   | BCKDHB        | LRP2      | SUSD1    |
| ALG9      | CLK1           | FMR1       | IFI30     | NSMCE4A   | RBM19    | TNPO2   | BCL7B         | LZTS2     | SYAP1    |
| AMFR      | CMTR1          | FN3KRP     | IFT81     | NTMT1     | RBM6     | TNPO3   | BLOC1S2       | MAGOH     | SYNE3    |
| ANKHD1    | CNIH4          | FNBP1L     | IKBKAP    | NUBP2     | RBM7     | TPM1    | BLVRB         | MAPK14    | TAF10    |
| ANP32B    | COX17          | FUBP1      | IMPDH1    | NUDCD1    | REL      | TPM3    | BRAP          | METTTL25  | TCF3     |
| ANP32E    | COX6A1         | FUS        | IMPDH2    | NUDCD2    | RER1     | TRIAP1  | C13ORF1       | MG44      | TCOF1    |
| APOE      | COX6B1         | FYTTD1     | IRAK1     | NUDT4     | RHBDD1   | TRIP13  | C8ORF33       | MIF       | TGFB1    |
| APRT      | CRKL           | G3BP       | IST1      | NUTF2     | RNF126   | TRIP64  | CCDC22        | MOCS1     | TM4SF2   |
| ARF4      | CSDA           | GARS       | ITGB6     | OGT       | RPIA     | TRMT11  | CCDC43        | MPC2      | TMEM115  |
| ARHGEF7   | CSRP2          | GART       | ITPR1     | OSBPL3    | RPL26    | TRMT61B | CD46          | MRS2      | TMEM14C  |
| ARL1      | CTPS1          | GET4       | JMJD6     | OXSRI     | RPL29    | TRNT1   | CDC23         | MXRA7     | TMEM167A |
| ASAP1     | CUL5           | GFM1       | KARS      | PANK2     | RPL31    | TTF2    | CENPT         | NCAPG2    | TMEM245  |
| ASCC2     | CUX1           | GLO1       | KATNAL2   | PCBD      | RPL35    | TUBA1A  | CENTG3        | NCSTN     | TOP3A    |
| ATP8      | CWC15          | GOPC       | KIAA1211  | PCNA      | RPL37    | TUBA1B  | CMBL          | NET1      | TOPBP1   |
| ATP8A1    | CXORF58        | GPATCH8    | KIF11     | PCNT      | RPS15    | TUBA1C  | CMC1          | NSMCE4A   | TRAM1    |
| AURKB     | CYP51A1        | GPSM1      | KNS2      | PDCL3     | RPS17    | TUBB    | COX6A1        | NUDCD2    | TRIP64   |
| B2M       | DAK            | GSK3A      | LACTB     | PDLIM5    | RPS19    | TUBB2B  | CSNK1G2       | NUSAP1    | UBE2C    |
| BANF1     | DBI            | GSTM3      | LANCL1    | PFKL      | RPS23    | TUBB2C  | CUX1          | OTUD3     | UBE2J1   |
| BANP      | DCK            | GTF2A1     | LDAH      | PFKM      | RPS24    | TUBB8   | DAK           | PARP2     | UNG      |
| BAT3      | DDT            | HCG_23833  | LDHB      | PFKP      | RPS29    | TWF2    | DCX           | PDCD5     | UQCC1    |
| BCAT1     | DDX19A         | HEL107     | LENG8     | PFN1      | RPS6KA1  | UBE2A   | DKFZP686G2045 | PIBF1     | VDAC3    |
| BLVRB     | DDX20          | HEL2       | LGMN      | PHF8      | RPS6KA3  | UBE2L3  | DNAH11        | PIG59     | VTA1     |
| BRAP      | DDX5           | HEL-76     | LSM6      | PHGDH     | RPS7     | UBN2    | EGLN1         | PIH1D1    | XPO6     |
| BSG       | DIS3           | HEL-S-1    | LTA4H     | PHKB      | RPSA     | UBR5    | ENPP1         | POLR2D    | YA61     |
| BTF3      | DKFZP434P232   | HEL-S-103  | LUC7L2    | PHOX2A    | RTCA     | UBXN1   | ESRP1         | PON2      | ZC3HAV1L |
| BTF3L4    | DKFZP547M202   | HEL-S-105  | MAD1L1    | PHYHIPL   | S100A10  | UCK2    | F2            | PPAT      | ZFYVE16  |
| C14ORF159 | DKFZP686E01144 | HEL-S-112  | MAP2K2    | PICALM    | S100A13  | UQCC2   | FABP5         | PPP4C     | ZNF234   |
| C19ORF53  | DKFZP686G2045  | HEL-S-133P | MCTS1     | PIG59     | SCAMP5   | VDAC3   | FAM114A2      | PRC1      |          |
| CACFD1    | DNAH11         | HEL-S-19   | MEA1      | PIN1      | SEC16A   | VPS37A  | FAM219A       | PRIM1     |          |
| CACYBP    | DNAH12         | HEL-S-44   | METTTL25  | PISD      | SEC24B   | VPS4A   | FDX1          | PTDSS2    |          |
| CAD       | DNAJA2         | HEL-S-49   | MEX3A     | PLD3      | SERBP1   | WDR55   | FN3KRP        | RAB29     |          |
| CAMK4     | DSP            | HEL-S-61   | MGC3731   | PLGRKT    | SERPINB6 | WFS1    | HBA2          | RAVER2    |          |
| CASC5     | DUSP3          | HEL-S-70   | MGST2     | PMVK      | SET      | WUGSC   | HBD/HBB       | REL       |          |
| CCDC43    | DYNC1LI2       | HEL-S-73   | MIF       | POP7      | SF3B2    | YWHAZ   | HCG_23833     | RIOK1     |          |
| CCDC72    | EDARADD        | HEL-S-87P  | MORF4L2   | PPP1R14B  | SLC11A2  | ZBTB33  | HIST1H2AH     | RPL26L1   |          |
| CCNT1     | EEF1A1         | HGH1       | MP68      | PPP4C     | SLC9A3R2 | ZCCHC17 | HIST1H2BA     | RPP25     |          |
| CCS       | EEF1B2         | HIP1R      | MRFAP1    | PQBP1     | SNW1     | ZFYVE16 | HIST1H3A      | RPS28     |          |
| CD151     | EIF3S1         | HIST1H2BA  | MRPS33    | PRC1      | SPECC1L  | ZNF234  | HMGNA4        | S100A10   |          |
| CDC42     | EIF4E          | HK2        | MSH3      | PRIC295   | SPG20    | ZNF24   | HNRNPA3       | SERINC1   |          |
| CDK2AP1   | EL52           | HLA-A      | MTG2      | PRKCI     | SRC      | ZNF711  | HNRPA1        | SERPINE2  |          |
| CEBPB     | ELOF1          | HLA-B      | MYH10     | PROCR     | STMN2    | ZNF768  | HOXC4         | SF3B2     |          |
| CECR2     | ENO1           | HLA-C      | MYH14     | PRPS1     | STRA6    | ZNF830  | HPCAL1        | SIGMAR1   |          |
| CENPE     | EPB41L2        | HMGNA4     | MYH9      | PSMA6     | STX1A    | ZUBR1   | HSD17B8       | SLC16A1   |          |
| CENPM     | EWSR1          | HN1        | MYL12A    | PSMC2     | STXBP2   |         | HSP90AB2P     | SLC23A2   |          |
| CENPP     | F2             | HNRNPAB    | MYL6      | PSMC3     | SUPT4H1  |         | HTATIP        | SLC39A10  |          |
| CENPU     | FAM114A2       | HNRNPDL    | NACA      | PSMC4     | SYNCRIP  |         | INSM2         | SLC39A14  |          |
| CENTG3    | FAM129B        | HNRPA1     | NAPG      | PSMD10    | TAF15    |         | IRAK1         | SLC44A1   |          |

**Supplementary Table S5    p113 expression in human NB tissues**

| Group                 | Total number | p113 expression |    |    |     | Positive rates (%) | P-Value |
|-----------------------|--------------|-----------------|----|----|-----|--------------------|---------|
|                       |              | –               | +  | ++ | +++ |                    |         |
| Age                   |              |                 |    |    |     |                    |         |
| <1 year               | 20           | 11              | 6  | 2  | 1   | 45.0               | 0.001   |
| ≥1 year               | 22           | 3               | 5  | 6  | 8   | 86.4               |         |
| Differentiation       |              |                 |    |    |     |                    |         |
| Well differentiated   | 8            | 6               | 1  | 1  | 0   | 25.0               | 0.001   |
| Poorly differentiated | 28           | 8               | 10 | 6  | 4   | 71.4               |         |
| Undifferentiated      | 6            | 0               | 0  | 1  | 5   | 100.0              |         |
| MKI                   |              |                 |    |    |     |                    |         |
| <200                  | 17           | 13              | 2  | 2  | 0   | 23.6               | 0.002   |
| >200                  | 25           | 1               | 9  | 6  | 9   | 96.0               |         |
| INSS stages           |              |                 |    |    |     |                    |         |
| Stage 1-2             | 14           | 8               | 5  | 1  | 0   | 42.9               | 0.003   |
| Stage 3-4             | 20           | 4               | 4  | 3  | 9   | 80.0               |         |
| Stage 4S              | 8            | 2               | 2  | 4  | 0   | 75.0               |         |
| MYCN amplification    |              |                 |    |    |     |                    |         |
| No                    | 34           | 12              | 10 | 6  | 6   | 64.7               | 0.158   |
| Yes                   | 8            | 2               | 1  | 2  | 3   | 75.0               |         |

MKI, mitosis karyorrhexis index; INSS, international neuroblastoma staging system.

# Supplementary Table S6 Mass spectrometry analysis of proteins pulled down by p113 antibody

|            |          |                |             |             |          |         |           |          |         |        |
|------------|----------|----------------|-------------|-------------|----------|---------|-----------|----------|---------|--------|
| AASDHPPT   | CBX8     | DHCR7          | FHL2        | IDH3B       | MRPL21   | NUP88   | PYCR1     | SLC16A1  | TOMM40  | ZNF346 |
| ABLIM1     | CCDC12   | DHX29          | FKBP5       | IGF2        | MRPL38   | NVL     | PYCR2     | SLC1A5   | TOMM70A | ZNF461 |
| ACAA2      | CCDC47   | DHX30          | FKBP8       | IGKV1-8     | MRPL39   | OSTC    | PYGL      | SLC25A1  | TOPBP1  | ZNF569 |
| ACBD3      | CCDC59   | DHX33          | FLG2        | IGKV1D-13   | MRPL40   | OXSRI   | RAB11FIP1 | SLC25A10 | TPI1    | ZNF579 |
| ACLY       | CCDC86   | DHX57          | FLII        | IKBKAP      | MRPL41   | P4HB    | RAB14     | SLC25A11 | TPM1    | ZNF592 |
| ACOT9      | CCT7     | DHX8           | FLJ00385    | ILKAP       | MRPL44   | PA2G4   | RAB1A     | SLC25A13 | TPM3    | ZNF593 |
| ACSL3      | CCT8     | DKFZp434E1119  | FLJ10154    | IMP3        | MRPL47   | PACIN3  | RAB1B     | SLC2A1   | TPM4    | ZNF622 |
| ACTN1      | CD2BP2   | DKFZp451G231   | FLYWCH1     | IMP4        | MRPL48   | PARD3   | RAB2      | SLC39A7  | TPT1    | ZNF668 |
| ACTN4      | CD59     | DKFZp666L156   | FN1         | INADL       | MRPL55   | PC4     | RAB34     | SLIRP    | TRIM21  | ZNF771 |
| ACTR2      | CDC2     | DKFZp686A111   | FP972       | IPO4        | MRPS12   | PCM1    | RAI14     | SLMAP    | TRIM27  | ZNF96  |
| ACTR3      | CDC2L2   | DKFZp686D1968  | FUBP1       | IPO7        | MRPS15   | PDCD4   | RALB      | SLU7     | TRIOBP  | ZRANB2 |
| ADH5       | CDC42EP1 | DKFZp686E1893  | GADD45GIP1  | IPO9        | MRPS16   | PDCD6IP | RANBP1    | SMARCC   | TRIP13  |        |
| ADM        | CDCT3    | DKFZp686E1899  | GART        | IRF2BP2     | MRPS23   | PDIA3   | RANBP5    | SMARCD   | TRIP6   |        |
| AFAP1      | CDK9     | DKFZp686E23276 | GFM1        | IRS4        | MRPS25   | PDS5A   | RANGAP1   | SMARCE1  | TRMT112 |        |
| AGBL5      | CDKN2AIP | DKFZp686G2045  | GFPT1       | ITIH2       | MRPS26   | PDS5B   | RAP2C     | SMC2     | TSFM    |        |
| AGK        | CENPB    | DKFZp686J0330  | GLS         | ITPA        | MRPS31   | PEG10   | RARS      | SMC4     | TSP0    |        |
| AHCY       | CFI      | DKFZp686L0869  | GLYR1       | ITPR3       | MRPS6    | PFKL    | RASL11B   | SMC5     | TSR3    |        |
| AHSG       | CGN      | DKFZp686M1669  | GMPS        | JUP         | MSH2     | PFN1    | RBF0X1    | SMPD4    | TUFT1   |        |
| AIF1L      | CHCHD1   | DKFZp762I166   | GNAI2       | KANK2       | MSH6     | PFN2    | RBM12B    | SMU1     | TWF1    |        |
| AKAP2      | CHMP1A   | DKFZp779I1858  | GNAI3       | KDELRL2     | MSL1     | PGAM1   | RBM15B    | SNW1     | TXLNG   |        |
| AKAP8L     | CHMP2A   | DNAJB1         | GNAS        | KIAA0020    | MST065   | PHF12   | RBM19     | SP1      | UACA    |        |
| ALDH18A1   | CHMP2B   | DNAJB6         | GNB1        | KIAA0992    | MTA2     | PHF3    | RBM22     | SPATA5   | UBAP2   |        |
| ALDH1B1    | CHMP3    | DNAJC11        | GNB2        | KIAA1671    | MTCH2    | PHGDH   | RBM7      | SPECC1   | UBE1    |        |
| ALDH9A1    | CHMP4B   | DNAJC2         | GNB4        | KIF14       | MTDH     | PIG60   | RBMS1     | SPEN     | UBTF    |        |
| ALG13      | CIF29    | DNAJC7         | GNG12       | KIF1A       | MTHFD1L  | PIP     | RCL1      | SPOP     | UFL1    |        |
| ALKBH5     | CKAP2    | DNM2           | GOT2        | KIF23       | MTHFD2   | PITPNC1 | RCOR1     | SPTBN1   | UHRF1   |        |
| AMOTL1     | CKAP4    | DNMBP          | GPBP1       | KIFC1       | MYCBP    | PKP2    | RDH11     | SPTBN2   | UMPS    |        |
| ANLN       | CKMT2    | DOCK7          | GPRC5A      | KLF16       | MYL1     | PKP4    | RECQL     | SPTLC1   | UNC45A  |        |
| ANP32A     | CLPB     | DPF2           | GPX3        | KLF4        | MYL6B    | PLAT    | REXO4     | SQSTM1   | URB1    |        |
| ANP32E     | CLPX     | DPYSL2         | GPX4        | KPNB1       | MYO15A   | PLEKHA7 | RFC2      | SRBD1    | USP39   |        |
| AP2A1      | CLTC     | DPYSL5         | GRSF1       | KRT78       | MYO18A   | PLEKHG  | RFC3      | SRM      | USP5    |        |
| AP2B1      | CMSS1    | DRG1           | GSN         | KRTCAP2     | MYO1B    | PLRG1   | RHOA      | SRPK1    | USP7    |        |
| AP4E1      | CNIH4    | DSG1           | GSTM3       | LA04NC01-25 | MYO1D    | PLS3    | RING1     | SRPK2    | USP9X   |        |
| APC        | CNN2     | DSG2           | GTF3C3      | LANCL2      | MYO1E    | POLR1C  | RIOK1     | SRRM1    | UTP23   |        |
| APEX1      | CNP      | DUSP11         | GTF3C4      | LARP4B      | MYO6     | POLR2B  | RNF114    | SSFA2    | UTP3    |        |
| APOBEC3A   | COA5     | DVL2           | GTF3C5      | LARS        | NAA10    | PON2    | RNF185    | SSR1     | UTP6    |        |
| APOBEC3C   | COBL     | DYNCH1H1       | GTPBP10     | LAS1L       | NACA     | PPAN-P2 | RNF2      | STAU2    | UTRN    |        |
| APRT       | COPA     | DYNLL2         | HABP2       | LBR         | NAP1L1   | PPIL1   | RNPEP     | STK26    | V5-4    |        |
| ARF1       | COPB1    | EAR52          | hCG_1821276 | LIMA1       | NARG1    | PPIL4   | ROCK1     | SUCLG1   | VAPA    |        |
| ARF4       | COPB2    | ECEL1          | hCG_1989366 | LIMCH1      | NCAPG    | PPP1R12 | RPH3AL    | SUPT5H   | VAPB    |        |
| ARHG       | COPG1    | ECHS1          | hCG_1996054 | LIN7C       | NCAPH    | PPP1R13 | RPL39P5   | SURF4    | VARS    |        |
| ARHGAP17   | COX3     | EFHD1          | hCG_2024613 | LOC392647   | NCBP1    | PPP1R9A | RPL7L1    | SVIL     | VASP    |        |
| ARHGEF1    | CP       | EGFR           | hCG_2032701 | LOC84524    | NCLN     | PPP1R9B | RPRD2     | SYNM     | VDAC1   |        |
| ARPC1B     | CPNE3    | EIF2A          | HCTP4       | LPCAT1      | NDNL2    | PPP2CA  | RPS28     | SYNPO    | VDAC3   |        |
| ARPC2      | CPSF2    | EIF2B2         | HDAC1       | LRRC1       | NDUFA10  | PPP2R1A | RRAS2     | TACO1    | VDP     |        |
| ARPC3      | CPSF3    | EIF2C2         | HEL-S-1     | LRRC47      | NDUFA13  | PPP2R2A | RRP36     | TAF10    | VEZF1   |        |
| ASNS       | CPT1A    | EIF2S1         | HEL-S-100n  | LRRFIP1     | NDUFA5   | PRC1    | RSBN1L    | TBC1D10  | VKORC1  |        |
| ATL3       | crn      | EIF3A          | HEL-S-108   | LRRFIP2     | NDUFB5   | PRIC295 | S         | TBL3     | VL1     |        |
| ATP2B1     | CSE1L    | EIF3C          | HEL-S-128m  | LSG1        | NDUFS1   | PRKAR2  | S100A10   | TCEB2    | VPS35   |        |
| ATP5F1     | CSNK2A1  | EIF3F          | HEL-S-22    | LTV1        | NDUFS5   | PRKCA   | S100A16   | TCERG1   | VPS4A   |        |
| ATP6V1G2-D | CSNK2B   | EIF3G          | HEL-S-269   | LUZP1       | NELFE    | PRKCI   | S100A6    | TECR     | WDR12   |        |
| ATP6V1H    | CSTF1    | EIF3L          | HEL-S-273   | LYN         | NEXN     | PRKRA   | SAMHD1    | TES      | WDR18   |        |
| AURKB      | CTBP1    | EIF4G2         | HEL-S-29    | MACF1       | NF2      | PRPF38B | SART3     | TFB1M    | WDR3    |        |
| BAF53A     | CTNNA1   | ELMSAN1        | HEL-S-2a    | MAGOHB      | NFX1     | PRPF4B  | SCIN      | TFRC     | WDR36   |        |
| BAIAP2L1   | CTNNB1   | ELOF1          | HEL-S-39    | MAGT1       | NIP7     | PRPS1   | SCRIB     | THBS1    | WDR43   |        |
| BAZ2A      | CTNND1   | EPB41L1        | HEL-S-62p   | MAP2K2      | NIPSNAP1 | PSIP1   | SDAD1     | THOC2    | WDR5    |        |
| BCAS2      | CTPS1    | EPB41L2        | HEL-S-66p   | MAP2K3      | NKAP     | PSMA5   | SEC24C    | THOC5    | WDR6    |        |
| BCKDHA     | CXorf57  | ERICH3         | HEL-S-68p   | MAP7D3      | NMD3     | PSMC4   | SEC61A1   | TIMM23B  | WDR75   |        |
| BOD1L1     | CYB5R3   | ERLIN2         | HEL-S-70p   | MAP9        | NME1     | PSMC5   | SEC61B    | TIMM50   | WRNIP1  |        |
| BPTF       | CYC1     | ERP44          | HEL-S-73    | MARCKSL1    | NME4     | PSMD1   | SEH1L     | TJP1     | XPOT    |        |
| BRD4       | CYTSA    | ERP70          | HEL-S-77p   | MARS        | NOL10    | PSMD12  | SENP3     | TJP2     | YAP1    |        |
| BSG        | DAP3     | ESYT2          | HEL-S-87p   | MAT2A       | NOL11    | PSMD13  | SEP-2     | TLE3     | YARS    |        |
| C10orf47   | DAPK3    | ETHE1          | HIGD1A      | MCM2        | NOL6     | PSMD14  | SERF2     | TMED10   | YTHDF1  |        |
| C12orf10   | DARS2    | EXOSC3         | HJURP       | MDC1        | NPEPPS   | PSMD2   | SF3A1     | TMEM109  | ZBTB11  |        |
| C1orf33    | DCTN4    | EXOSC5         | HM13        | MECP2       | NPM3     | PSMD4   | SF3A3     | TMEM113  | ZC3H15  |        |
| C1orf57    | DDOST    | EXOSC9         | HMGA1       | MFAP1       | NQO1     | PSMD6   | SF3B3     | TMEM165  | ZCCHC10 |        |
| C7         | DDX10    | EZH2           | HNRNPDL     | MGC3731     | NSF      | PSMG1   | SFRS11    | TMEM200  | ZCCHC3  |        |
| C7orf11    | DDX19A   | F5             | HOMER1      | MGST3       | NUP107   | PTDSS1  | SFRS17A   | TMEM214  | ZFYVE19 |        |
| C8orf33    | DDX24    | FAM208A        | HS24/p52    | MISP        | NUP133   | PTGES3  | SFXN3     | TMEM63A  | ZGRF1   |        |
| CAMK2D     | DDX31    | FAM208B        | HSD17B10    | MLLT4       | NUP160   | PTK2    | SFXN4     | TMOD1    | ZMPSTE2 |        |
| CAMK2G     | DDX49    | FAM53C         | HSD17B4     | MPDZ        | NUP188   | PTPN1   | SH3GL1    | TMOD2    | ZMYND8  |        |
| CAPZA2     | DDX51    | FAM76A         | HSP90AB2P   | MPG         | NUP205   | PTRF    | SIPA1     | TNKS1BP  | ZNF185  |        |
| CAPZB      | DDX56    | FAM76B         | HSPA14      | MPP5        | NUP43    | PUF60   | SIPA1L1   | TNPO1    | ZNF22   |        |
| CASC3      | DECR2    | FARSB          | HUWE1       | MRIP        | NUP62    | PUM1    | SIPA1L3   | TOE1     | ZNF281  |        |
| CAT56      | DGKK     | FGF2           | ICT1        | MRPL16      | NUP85    | PUS7    | SKP1      | TOMM20   | ZNF316  |        |

**Supplementary Table S7 Mass spectrometry analysis of proteins pulled down by Flag antibody**

|           |          |               |            |             |           |         |             |          |          |         |        |
|-----------|----------|---------------|------------|-------------|-----------|---------|-------------|----------|----------|---------|--------|
| AAAS      | C1ORF33  | CTNND1        | EIF3A      | HCG_199605  | LIMCH1    | MYO1E   | PIH1D1      | RANBP1   | SLC7A5   | TNPO1   | YTHDC2 |
| AASDHPP   | C1ORF57  | CTPS1         | EIF3M      | HCG_202273  | LIN7C     | MYO5A   | PIP         | RANBP5   | SLIRP    | TOE1    | ZAK    |
| ABLIM1    | C3ORF17  | CTR9          | EIF4E      | HCG_202461  | LOC392647 | MYO6    | PITPNC1     | RANGAP1  | SLMAP    | TOMM20  | ZBTB1  |
| ABT1      | C8ORF33  | CXORF57       | EIF4G2     | HCG_2032701 | LOC84524  | MYOF    | PKP2        | RAP2C    | SLU7     | TOMM34  | ZC3H15 |
| ACADVL    | CAMK2D   | CXXC1         | ELMSAN1    | HCG_39854   | LPP       | NAA10   | PKP4        | RARS     | SMARCD2  | TOMM40  | ZCCHC1 |
| ACLY      | CAMK2G   | CYC1          | EP400      | HCG_41772   | LRRC1     | NACA    | PLAT        | RASL11B  | SMARCE1  | TOMM70A | ZCCHC3 |
| ACOT9     | CAPZA2   | CYTSA         | EPB41L1    | HDAC1       | LRRC47    | NAP1L1  | PLEC1       | RBFOX1   | SMC2     | TOP3B   | ZFC3H1 |
| ACSL3     | CAPZB    | DAD1          | EPB41L2    | HDGFRP2     | LRRFIP1   | NAP1L4  | PLEKHA7     | RBM12B   | SMC4     | TP53BP2 | ZFYVE1 |
| ACTN1     | CAT56    | DAP3          | ERGIC1     | HEL-S-1     | LRRFIP2   | NARG1   | PLEKHG3     | RBM15B   | SMC5     | TPM1    | ZGRF1  |
| ACTN4     | CBX4     | DAPK3         | ERICH3     | HEL-S-100N  | LUZP1     | NCAPD2  | PLRG1       | RBM22    | SMPD4    | TPM3    | ZMPSTE |
| ACTR1A    | CBX6     | DARS2         | ERLIN2     | HEL-S-106   | LYN       | NCAPG   | PLS3        | RBM26    | SMU1     | TPM4    | ZNF185 |
| ACTR2     | CCDC12   | DCAF7         | ERP44      | HEL-S-108   | LZTS2     | NCAPH   | POGZ        | RBMS1    | SNRBP2   | TPRN    | ZNF22  |
| ACTR3     | CCDC168  | DCTN4         | ERP70      | HEL-S-128M  | MACF1     | NCBP1   | POLDIP2     | RCC1     | SNRPG    | TPT1    | ZNF280 |
| ADH5      | CCDC47   | DDOST         | ESYT2      | HEL-S-19    | MACROD1   | NCKAP1  | POLE3       | RCL1     | SNW1     | TRAF4   | ZNF316 |
| AFAP1     | CCDC86   | DDX10         | ETHE1      | HEL-S-22    | MAGOH8    | NCLN    | POLR1C      | RCN2     | SORBS3   | TRIM21  | ZNF346 |
| AGBL5     | CCT7     | DDX20         | EXOSC2     | HEL-S-269   | MAGT1     | NDNL2   | POLR2B      | RCOR1    | SP1      | TRIM25  | ZNF461 |
| AGK       | CCT8     | DDX24         | EXOSC3     | HEL-S-273   | MAP2K2    | NDUFA10 | POLRMT      | RDH11    | SPATA5   | TRIM27  | ZNF569 |
| AGO2      | CD2BP2   | DDX31         | EXOSC6     | HEL-S-29    | MAP2K3    | NDUFA13 | POM121C     | RECQL    | SPECC1   | TRIM4   | ZNF593 |
| AGPS      | CD59     | DDX51         | EZH2       | HEL-S-2A    | MAP7D3    | NDUFA5  | POP7        | REXO4    | SPEN     | TRIOBP  | ZNF622 |
| AHCY      | CDC2     | DDX55         | F5         | HEL-S-62P   | MARCKSL1  | NDUFS1  | PPAN-P2RY11 | RFC2     | SPTBN1   | TRIP13  | ZNF668 |
| AHSG      | CDC40    | DDX56         | FAM208B    | HEL-S-66P   | MARS      | NDUFS5  | PPIL1       | RFC3     | SPTBN2   | TRIP6   | ZNF771 |
| AIF1L     | CDC42EP1 | DECER2        | FAM76A     | HEL-S-68P   | MAT2A     | NDUFS7  | PPIL4       | RHOA     | SPTLC1   | TRMT112 | ZRANB2 |
| AIMP2     | CDK9     | DERL1         | FAM76B     | HEL-S-73    | MBD3      | NDUFS8  | PPP1R12A    | RING1    | SQSTM1   | TSFM    |        |
| AKAP2     | CECR5    | DGKK          | FAM83H     | HEL-S-77P   | MBNL1     | NELFE   | PPP1R13L    | RIOK1    | SRPK1    | TSPO    |        |
| AKAP8L    | CELF1    | DHCR7         | FARP1      | HEXIM1      | MCM2      | NES     | PPP1R9A     | RNASEH1  | SRPK2    | TSR1    |        |
| ALDH18A1  | CENPB    | DHX29         | FERMT2     | HMGAI       | MDC1      | NEXN    | PPP1R9B     | RNF114   | SSB      | TSR3    |        |
| ALDH1B1   | CENPV    | DHX30         | FGF2       | HMMR        | MECP2     | NF2     | PPP2CA      | RNF185   | SSFA2    | TUFT1   |        |
| ALDH2     | CEP63    | DHX33         | FKBP8      | HNRNPDL     | MEPCE     | NFX1    | PPP2R1A     | RNF2     | SSR1     | TWF1    |        |
| ALDH7A1   | CFI      | DHX57         | FLII       | HOMER1      | MFAP1     | NIP7    | PPP2R2A     | RNMTL1   | SSR3     | TXLNA   |        |
| ALDH9A1   | CGN      | DHX8          | FLJ00163   | HS24/P52    | MGC3731   | NMD3    | PPP3CA      | RPA1     | SSR4     | UACA    |        |
| ALG1      | CHAMP1   | DIS3          | FLJ00385   | HSD17B10    | MISP      | NME4    | PRC1        | RPH3AL   | STAU2    | UBAP2   |        |
| ALPL      | CHCHD3   | DKFZP434E1119 | FLJ10154   | HSD17B4     | MLF2      | NOB1    | PRIC295     | RPL7L1   | STIP1    | UBE1    |        |
| AMOTL1    | CHMP1A   | DKFZP586K0821 | FN1        | HSP90AB2P   | MLLT4     | NOC2L   | PRKAR2A     | PPP30    | STK26    | UBTF    |        |
| ANLN      | CHMP2A   | DKFZP586O0821 | FUBP1      | HSPA14      | MPDZ      | NOL10   | PRKCA       | RPS28    | STOML2   | UBXN1   |        |
| ANP32A    | CHMP4B   | DKFZP686A111  | GADD45GIP1 | HSPH1       | MPG       | NOL11   | PRKCI       | RRA52    | SUCLG1   | UCHL5   |        |
| ANP32E    | CHORDC1  | DKFZP686E1899 | GALE       | HUWE1       | MPP5      | NOL6    | PRPF3       | RRP36    | SUGP2    | UCK2    |        |
| AP2A1     | CIAO1    | DKFZP686E2327 | GAN        | HYOU1       | MRIPR     | NOL8    | PRPF31      | RSBN1    | SUPT5H   | UFL1    |        |
| AP2B1     | CIP29    | DKFZP686G2045 | GAPVD1     | IARS2       | MRPL16    | NOP10   | PRPF38B     | S        | SURF4    | UMPS    |        |
| AP2M1     | CKAP2    | DKFZP686J0330 | GART       | IDH3B       | MRPL19    | NPM3    | PRPF4B      | S100A10  | SURF6    | UNC45A  |        |
| AP4E1     | CKAP4    | DKFZP686J162  | GBX2       | IGF2        | MRPL22    | NSF     | PRPS1       | S100A16  | SVIL     | URB1    |        |
| APC       | CKAP5    | DKFZP686L0869 | GEMIN4     | IGKV1-8     | MRPL24    | NUP107  | PSIP1       | S100A6   | SYNM     | URCC5   |        |
| APEX1     | CKMT2    | DKFZP686M1669 | GFM1       | IKBKAP      | MRPL3     | NUP133  | PSMA4       | S100P    | SYNPO    | USP14   |        |
| APOBEC3   | CLOCK    | DKFZP762C1015 | GFPT1      | ILK         | MRPL38    | NUP160  | PSMA5       | SAE1     | TACO1    | USP5    |        |
| APRT      | CLPB     | DKFZP762I166  | GJA1       | ILKAP       | MRPL4     | NUP188  | PSMC4       | SAMM50   | TBC1D10B | USP7    |        |
| ARCN1     | CLPX     | DKFZP779J1858 | GLE1       | IMP3        | MRPL40    | NUP205  | PSMC5       | SART3    | TBL1XR1  | USP9X   |        |
| ARF1      | CLTC     | DMD           | GLRX3      | IMP4        | MRPL41    | NUP43   | PSMD1       | SCAMP3   | TBL3     | UTP23   |        |
| ARF4      | CNIH4    | DNAJB1        | GLYR1      | INADL       | MRPL47    | NUP85   | PSMD12      | SCIN     | TCEB2    | UTP3    |        |
| ARHG      | CNN2     | DNAJB11       | GMPS       | IPO7        | MRPL48    | NUP88   | PSMD13      | SCML2    | TECR     | UTP6    |        |
| ARHGAP1   | CNOT1    | DNAJB12       | GNA11      | IRS4        | MRPL49    | NVL     | PSMD14      | SCO2     | TES      | UTRN    |        |
| ARHGEF1   | CNP      | DNAJB6        | GNA13      | ITPR3       | MRPL54    | NXT2    | PSMD2       | SCRIB    | TEX10    | VAPA    |        |
| ARL6IP4   | COA5     | DNAJC11       | GNA12      | JUP         | MRPL55    | OAS3    | PSMD4       | SDAD1    | TFAM     | VAPB    |        |
| ARPC1B    | COBL     | DNAJC2        | GNAI3      | KANK2       | MRPS10    | OGT     | PSMD6       | SEC23A   | TFB1M    | VARS    |        |
| ARPC3     | COPA     | DNAJC7        | GNAS       | KDELRL2     | MRPS12    | OSTC    | PSMD8       | SEC24C   | TFCP2    | VASP    |        |
| ARPC4     | COPB1    | DNM2          | GNB1       | KHDRBS3     | MRPS15    | OXSR1   | PSMG1       | SEC61A1  | TFRC     | VDAC1   |        |
| ASNS      | COPB2    | DNMBP         | GNB2       | KIAA0020    | MRPS16    | PA2G4   | PTCD3       | SEC61B   | THBS1    | VDAC3   |        |
| ATL3      | COPE     | DOCK7         | GNB4       | KIAA0992    | MRPS23    | PACIN3  | PTDSS1      | SEN3P    | THEX1    | VDP     |        |
| ATP2B1    | COPG1    | DPF2          | GNB12      | KIAA1671    | MRPS25    | PAF1    | PTPN1       | SEP-2    | THOC2    | VEZF1   |        |
| ATP5F1    | CORO2A   | DPYSL2        | GOLGA2     | KIF14       | MRPS26    | PAICS   | PUF60       | SEP-7    | THOC3    | VPS18   |        |
| ATP5H     | COX3     | DRG1          | GOT2       | KIF22       | MRPS28    | PARD3   | PUM1        | SEP-9    | THOC5    | VPS35   |        |
| ATP5J2-PT | COX7A2   | DSG1          | GPBP1      | KIFC1       | MRPS31    | PBRM1   | PUS7        | SERF2    | TIMM50   | VPS37B  |        |
| ATP6V1G2  | CP       | DSG2          | GPR50      | KLF16       | MRPS6     | PKC2    | PUSL1       | SF3A1    | TJP1     | VPS4A   |        |
| ATRN      | CPNE1    | DVL2          | GPRC5A     | KLF4        | MSH2      | PCM1    | PYCR1       | SF3B3    | TJP2     | WDR12   |        |
| AURKB     | CPNE3    | DYNC1H1       | GPX3       | KPNB1       | MSH6      | PDCD4   | PYCR2       | SFRS17A  | TLN1     | WDR18   |        |
| BAF53A    | CPSF2    | DYNC1L1       | GPX4       | KRT78       | MST065    | PDCD6IP | PYCRL       | SH3GL1   | TM9SF3   | WDR3    |        |
| BAIAP2L1  | CPSF3    | DYNLL2        | GRSF1      | KRTAP2-1    | MTA1      | PDIA3   | PYGL        | SIPA1L1  | TMED10   | WDR36   |        |
| BAZ2A     | CPT1A    | EARS2         | GSN        | KRTCAP2     | MTCH2     | PDK1    | RAB11A      | SIPA1L3  | TMEM109  | WDR43   |        |
| BCAS2     | CRIP1    | EED           | GSPT1      | LA04NC01-25 | MTDH      | PDLIM7  | RAB11FIP1   | SKP1     | TMEM11   | WDR5    |        |
| BCOR      | CRN      | EFHD1         | GTF3C3     | LAMB1       | MTHFD1L   | PDS5B   | RAB14       | SLC16A1  | TMEM113  | WDR6    |        |
| BPTF      | CS       | EGFR          | GTF3C4     | LANCL2      | MTHFD2    | PFKL    | RAB1A       | SLC16A3  | TMEM165  | WDR75   |        |
| BRD2      | CSE1L    | EHD1          | GTF3C5     | LARP4B      | MYCBP     | PFN1    | RAB1B       | SLC25A1  | TMEM205  | XPO1    |        |
| BRD4      | CSNK2A1  | EHD4          | GTPBP1     | LARS        | MYL1      | PFN2    | RAB34       | SLC25A10 | TMEM214  | XPO5    |        |
| BSG       | CSNK2B   | EIF2A         | HABP2      | LARS        | MYL6B     | PGAM1   | RAB7A       | SLC25A11 | TMEM263  | XPOT    |        |
| C10ORF47  | CTBP1    | EIF2B2        | HAT1       | LEMED3      | MYO18A    | PHF3    | RAB9A       | SLC25A13 | TMOD1    | YAP1    |        |
| C18ORF21  | CTNNA1   | EIF2D         | HCG_182127 | LIG3        | MYO1B     | PHGDH   | RAI14       | SLC2A1   | TMOD2    | YARS    |        |
| C19ORF70  | CTNNB1   | EIF2S1        | HCG_198936 | LIMA1       | MYO1D     | PHIP    | RALB        | SLC39A7  | TNKS1BP1 | YME1L1  |        |
